1 **Deciphering and modelling the TGF- $\beta$  signalling interplays specifying the dorsal-**  
2 **ventral axis of the sea urchin embryo**

3

4 Swann Floc'hlay<sup>1</sup>, Maria Dolores Molina<sup>2#</sup>, Céline Hernandez<sup>1#</sup>, Emmanuel Haillet<sup>2</sup>,  
5 Morgane Thomas-Chollier<sup>1,3</sup>, Thierry Lepage<sup>2\*</sup> and Denis Thieffry<sup>1\*</sup>,

6

7

8 1. Institut de Biologie de l'ENS (IBENS), École Normale Supérieure, CNRS, INSERM,  
9 Université PSL, 75005 Paris, France.

10

11 2. Institut Biologie Valrose, Université Côte d'Azur, Nice, France.

12

13 3. Institut Universitaire de France (IUF), 75005 Paris, France.

14

15 \* Corresponding authors

16 Emails: [denis.thieffry@ens.psl.eu](mailto:denis.thieffry@ens.psl.eu); [tlepage@unice.fr](mailto:tlepage@unice.fr)

17 # These authors contributed equally to this work.

18

19

20 **Abstract**

21

22 During sea urchin development, secretion of Nodal and BMP2/4 ligands and their antagonists

23 Lefty and Chordin from a ventral organizer region specifies the ventral and dorsal territories.

24 This process relies on a complex interplay between the Nodal and BMP pathways through

25 numerous regulatory circuits. To decipher the interplay between these pathways, we used a

26 combination of treatments with recombinant Nodal and BMP2/4 proteins and a

27 computational modelling approach. We assembled a logical model focusing on cell responses

28 to signalling inputs along the dorsal-ventral axis, which was extended to cover ligand

29 diffusion and enable multicellular simulations. Our model simulations accurately recapitulate

30 gene expression in wild type embryos, accounting for the specification of ventral ectoderm,

31 ciliary band and dorsal ectoderm. Our model simulations further recapitulate various

32 morphant phenotypes, reveals a dominance of the BMP pathway over the Nodal pathway,

33 and stresses the crucial impact of the rate of Smad activation in D/V patterning. These results

34 emphasise the key role of the mutual antagonism between the Nodal and BMP2/4 pathways  
35 in driving early dorsal-ventral patterning of the sea urchin embryo.

36

37 **Running title:** Sea urchin DV axis specification

38

39 **Key words:** *Paracentrotus lividus*, embryo development, logical model, gene regulatory  
40 network, Nodal pathway, BMP pathway.

41

42 **Summary Statement:** We propose a predictive computational model of the regulatory  
43 network controlling the dorsal-ventral axis specification in sea urchin embryos, and highlight  
44 key features of Nodal and BMP antagonism.

46

## 47 **Introduction**

48

49 During embryonic development, cell fate is specified by transcription factors activated in  
50 response to instructive signals. Regulatory interactions between signalling molecules and  
51 their target genes form networks, called Gene Regulatory Networks (GRN) (Arnone and  
52 Davidson, 1997). Deciphering such GRNs is a key for developmental biologists to understand  
53 how information encoded in the genome is translated into cell fates, then into tissues and  
54 organs, and how morphological form and body plan can emerge from the linear DNA  
55 sequence of the chromosomes (Levine and Davidson, 2005). Noteworthy, the gene regulatory  
56 network orchestrating the morphogenesis of the ectoderm along the dorsal-ventral axis of the  
57 embryo of the model sea urchin *Paracentrotus lividus* has started to be uncovered in great  
58 detail ([Haillot et al., 2015](#); [Lapraz et al., 2015](#); [Li et al., 2012](#); [Li et al., 2013](#); [Li et al., 2014](#);  
59 [Molina et al., 2018](#); [Range et al., 2007](#); [Saudemont et al., 2010](#); [Su et al., 2009](#) and reviewed  
60 [in Molina et al., 2013](#)).

61

62 The ectoderm of the sea urchin larva is constituted of two opposite ventral and dorsal  
63 territories, separated by a central ciliary band (Fig. 1A):

64

65 The ventral ectoderm is the territory at the centre of which the mouth will be formed.  
66 Specification of the ventral ectoderm critically relies on signalling by Nodal, a secreted  
67 growth factor of the TGF- $\beta$  family ([Duboc et al., 2004](#); reviewed in [Molina et al., 2013](#)). The  
68 expression of *nodal* is turned on by maternal factors, while Nodal stimulates and maintains its  
69 own expression through a positive feedback circuit ([Bolouri and Davidson 2010](#); [Range et al.,](#)  
70 [2007](#); [Range and Lepage, 2011](#)). Nodal is zygotically expressed and is thought to dimerise  
71 with another TGF- $\beta$  ligand maternally expressed called Univin ([Range et al., 2007](#)); the  
72 Nodal-Univin heterodimer promotes Alk4/5/7 signalling and the activation of Smad2/3  
73 together with Smad4. The ventral ectoderm boundary is thought to be positioned by the  
74 activity of the product of the Nodal target gene *lefty*, which prevents the expansion of *nodal*  
75 expression beyond the ventral ectoderm region via a diffusion-repression mechanism ([Chen](#)  
76 [et al., 2004](#); [Cheng et al., 2004](#); [Duboc et al., 2008](#); [Molina et al., 2013](#); [Sakuma et al., 2002](#)).

77

78 The ciliary band ectoderm is a proneural territory located between the ventral and dorsal  
79 ectoderm ([Angerer et al., 2011](#)). The ciliary band is made of prototypical cuboidal epithelial

80 cells and runs along the arms of the pluteus larva. Unlike the specification of the ventral and  
81 the dorsal ectoderm, which actively requires TGF- $\beta$  signalling, the specification of the ciliary  
82 band tissue does not rely on Nodal or BMP signalling, and this tissue develops as a “default”  
83 state of the ectoderm in the absence of these signals (Saudemont et al., 2010).

84

85 The dorsal ectoderm is the territory that will differentiate into the apex of the pluteus larva.  
86 Its specification relies on the diffusion of ventrally synthesized BMP2/4, which promotes  
87 dorsal fates by activating phosphorylation of Smad1/5/8 via the activation of the BMP type I  
88 receptors Alk1/2 and Alk3/6. The inhibition of BMP signalling, on the ventral side, and the  
89 translocation of BMP2/4, to the dorsal side, require the product of the *chordin* gene, which is  
90 activated in the ventral ectoderm downstream of Nodal signalling (Lapraz et al., 2009).

91 Glypican5 is expressed downstream of BMP2/4 signalling and contributes to stabilize BMP  
92 signalling on the dorsal side via a positive feedback circuit (Lapraz et al., 2009). In addition,  
93 the BMP ligands Admp1 and Admp2 damp BMP signalling fluctuations through an  
94 expansion-repression mechanism (Ben-Zvi et al., 2008; De Robertis, 2009; Joubin and Stern,  
95 2001; Kimelman and Pyati, 2005; Lapraz et al., 2015; Lele et al., 2001; Reversade and De  
96 Robertis, 2005; Willot et al., 2002). This mechanism, which relies on the transcriptional  
97 repression of *admp1* expression by BMP2/4 signalling, allows *admp1* expression to increase  
98 and ADMP1 protein to be shuttled to the dorsal side by Chordin when BMP signalling  
99 decreases. Thus, an increase in *admp1* expression compensates for the reduction of the  
100 intensity of BMP signalling.

101

102 One prominent feature of the D/V onset specification is that it relies extensively on the  
103 maternal inputs Panda and Univin, which respectively represses and promotes ventral fate  
104 (Range et al., 2007, Haillet et al., 2015, reviewed in Molina and Lepage, 2020). Univin is a  
105 TGF- $\beta$  related to Vg1 and GDF1/3. Univin is essential for Nodal signalling through the  
106 Nodal/Activin receptors; in absence of Univin, Nodal expression stops and D/V axis  
107 specification fails. Panda is a member of the TGF- $\beta$  superfamily presumed to repress ventral  
108 fate by a still unidentified mechanism (Haillet et al., 2015). Finally, the transcriptional  
109 repressor Yan/Tel acts as a negative regulator of *nodal* expression, whose expression is  
110 required downstream of Panda (Molina et al., 2018).

111

112 Previous studies have shown that Nodal produced by the ventral ectoderm is a strong  
113 ventralising signal (Duboc et al., 2004; Lapraz et al., 2015; Saudemont et al., 2010).

114 Overexpression of *nodal* causes all ectodermal cells to adopt a ventral fate (Fig. 1B), whereas  
115 a loss of Nodal function prevents specification of both ventral and dorsal fates and causes the  
116 ectoderm to differentiate as a ciliary band (Fig. 1C). Conversely, the activity of BMP2/4  
117 protein promotes dorsalisation, and overexpression of BMP2/4 forces all ectoderm cells to  
118 adopt a dorsal fate (Haillot et al., 2015; Lapraz et al., 2009; Lapraz et al., 2015) (Fig. 1D). In  
119 contrast, removing the function of the BMP2/4 ligand from fertilisation on prevents  
120 specification of dorsal fates, leading to formation of an ectopic ciliary band territory in the  
121 dorsal region (Fig. 1E). Additionally, knocking down *panda* expression in this BMP2/4 loss-  
122 of-function experiment enables *nodal* to be expressed through the dorsal side of the ectoderm  
123 and promotes ventral fates in all ectodermal cells (Fig. 1F). Conversely, a local *panda*  
124 overexpression promotes dorsal fates, suggesting that *panda* is sufficient to break the radial  
125 symmetry of the embryo and necessary to specify the D/V axis (Haillot et al., 2015). The  
126 BMP and Nodal ligands thus show strongly antagonistic activities. However, the mechanism  
127 underlying this antagonism and the resulting cell fate decision still awaits clarification.

128

129 Due to the largely non-cell autonomous nature of the D/V GRN, to the many events of  
130 protein diffusion, and to the intertwined feedback circuits involved, an intuitive  
131 understanding of the logic of the network is hard to obtain. For example, Nodal and BMP2/4  
132 are co-expressed in the ventral territory, but the corresponding signalling pathways are  
133 operating at opposite poles of the D/V axis. In this context, a model of the D/V gene  
134 regulatory network is very useful to formalise the complex regulatory interactions at stake  
135 (Wilczynski and Furlong, 2010). A Gene Regulatory Network can be modelled as a static  
136 regulatory graph using standardised graphical conventions to represent the molecular  
137 interactions between relevant regulator components (Arnone and Davidson, 1997). Such  
138 regulatory graphs can be supplemented with threshold levels and regulatory rules to obtain a  
139 predictive, dynamical model (Mbodj et al., 2016; Peter et al., 2012; Thomas and D'Ari,  
140 1990).

141

142 In the present study, we built a logical model (i.e. using Boolean algebra for the regulatory  
143 rules) of the sea urchin dorsal-ventral specification GRN to (i) assess its accuracy, (ii)  
144 compare the simulations of different perturbations with the observed gene expression  
145 patterns, (iii) explore the dynamics of the system, and (iv) develop a multicellular framework  
146 to test the ability of the model to generate the spatial patterns observed in wild type and  
147 perturbed embryos.

148

## 149 **Results**

150

### 151 Model building

152 We constructed a model of the GRN driving the D/V patterning of the sea urchin ectoderm.

153 We started by compiling experimental data to identify the key genes and regulatory  
154 interactions (Fig. 2). The raw data that provided the spatial and temporal expression  
155 information to build the model were derived from the analysis of high resolution in situ  
156 hybridizations, Northern blot and systematic perturbations experiments. Loss-of-function  
157 experiments via morpholino injections are particularly important for GRN reconstruction  
158 since they allow to test if a gene is required for activation of another gene. Gain-of-function  
159 experiments via mRNA injection were also used in many instances to test for the ability of a  
160 given gene to induce another gene when overexpressed.

161

162 Based on these data, we first built a regulatory graph representing the D/V GRN in a single  
163 cell, using the software GINsim ([ginsim.org](http://ginsim.org)) (Naldi et al., 2018). The model has been built  
164 through an iterative process, alternating simulations and model refinements, to optimise our  
165 simulation results as compared to experimental observations (Fig. 2). An extensive analysis  
166 of published data enables us to delineate relevant regulatory interactions and formalise them  
167 in terms of a signed, directed graph, complemented with logical rules (see Material and  
168 methods). The resulting model was then subjected to computational analyses, which were  
169 confronted to experimental data. The analysis of discrepancies led us to revise the network  
170 and the regulatory rules (e.g. by incorporating a new interaction), until the simulations  
171 qualitatively recapitulate all relevant experimental observations (Fig. 2). The main challenge  
172 encountered during this process consisted in the integration of multiple interactions targeting  
173 the same component. Indeed, the number of possible regulatory rules exponentially increases  
174 with the number of incoming interactions. The regulatory rules must correctly reflect the  
175 relative importance of each incoming signal, taking into account different qualitative ranges.  
176 These rules are encoded using the classical logical operators (AND/OR/NOT), together with  
177 multilevel variables when justified (see Material and methods).  
178 At the end of this iterative process, the model was further refined based on the results of  
179 novel experiments designed to disentangle the interplay between Nodal and BMP2/4  
180 pathways (Fig. 2).

181 Regarding the computational analyses performed, we combined three main approaches: i) a  
182 direct computation of stable states for relevant input combinations, ii) stochastic simulations  
183 to estimate the probabilities of alternative cell fates (*chordin* morpholino), and iii) logical  
184 multicellular simulations to cover intercellular signalling events (see Results).

185

186 We present hereafter the final model and selected simulations recapitulating the patterns  
187 observed experimentally. The model encompasses a total of 30 nodes, linked by 23  
188 activations and 15 inhibitions (Fig. 3). The nodes included into the model correspond to  
189 signalling and regulatory components, while the signed arcs denote regulatory interactions  
190 between these components. Signalling factors are modelled as input nodes (in yellow in Fig.  
191 3), providing activatory or inhibitory signals through the corresponding membrane receptors.

192

193 Each (non-input) component is classified as ventral (eleven nodes shown in blue in Fig. 3),  
194 ciliary band (two nodes shown in pink in Fig. 3) or dorsal (eight nodes shown in green in Fig.  
195 3), according to the reported location and time of activation in the presumptive ectodermal  
196 regions. For example, *gooseoid* is activated by the Nodal cascade in the ventral region in  
197 wild-type condition, and is thus considered as a ventral gene. The model encompasses the  
198 main regulatory components of TGF- $\beta$  signalling pathways, including the ligands, negative  
199 regulators such as the proteins that trigger receptor degradation, downstream transcription  
200 factors, and antagonists. Each component of the model is annotated with textual explanations  
201 and database links (in particular to PubMed) documenting our modelling assumptions (main  
202 references include the GRN diagram published for *Paracentrotus lividus* in Haillet et al.,  
203 2015; Lapraz et al., 2006; Lapraz et al., 2015; Molina et al., 2013; Range et al., 2007;  
204 Saudemont et al., 2010).

205

206 Among the 30 components of the model, 20 are associated with Boolean variables (ellipsoid  
207 nodes in Fig. 3, taking the values 0 or 1 depending on their activation state), while the  
208 remaining components are associated with multilevel variables (rectangular nodes in Fig. 3,  
209 associated with three or four integer levels, from zero to 2 or 3, see below). The nine input  
210 nodes (shown in yellow in Fig. 3) define 576 possible configurations of input values. Using  
211 the Java library bioLQM (Naldi, 2018), we identified 654 stable states, which can be split  
212 into three main patterns based on the active nodes: 288 ventral, 126 ciliary and 240 dorsal  
213 patterns (cf. Jupyter notebook).

214

215 An antagonism between the Nodal and BMP2/4 pathways drives the allocation of cell fates  
216 along the dorsal-ventral axis.

217 A key feature of our model consists in the antagonistic activities of BMP2/4 and Nodal. In  
218 this respect, additional experiments were conducted to probe the underlying mechanisms. We  
219 first tested whether difference in dosage between the corresponding signalling molecules  
220 could favour the establishment of a specific cell fate. Treatment with an intermediate dose of  
221 BMP2/4 protein resulted in embryos developing with a straight archenteron, no mouth, and  
222 covered with a ciliary band like ectoderm (Fig. 4A), which is a prototypical *nodal* loss-of-  
223 function phenotype. In contrast, for intermediate doses of Nodal, the embryos developed with  
224 a reduced apex, reminiscent of the BMP2/4 loss-of-function phenotype. These observations  
225 suggest that ectodermal cells receive both antagonistic ventralising Nodal and dorsalisng  
226 BMP2/4 signals, and integrate them even at intermediary doses at the level of the *cis*-  
227 regulatory sequences of their target genes.

228

229 However, since these treatments were performed soon after fertilisation, it was not clear  
230 whether the outcome was reflecting an antagonism between Nodal and BMP occurring during  
231 cell fates allocation, or if it resulted from one pathway being activated early and dominantly  
232 in all cells of the embryo following the injection of mRNA into the egg. To address this issue,  
233 we repeated the Nodal and BMP2/4 treatment at late blastula and at early mesenchyme  
234 blastula stage. Treatments with Nodal or with BMP2/4 proteins at late blastula radialised the  
235 embryos by respectively inducing ventral or dorsal fate in all ectodermal cells (Fig. 4B).  
236 These results confirm that Nodal and BMP2/4 pathways act antagonistically also during fate  
237 specification and that a dosage competition plays an important role in cell fate specification.

238

239 These results led us to pay a particular attention to the encoding of this antagonism in our  
240 model. First, to account for dosage effects, we associated ten nodes of the model with ternary  
241 variables (rectangular nodes in Fig. 3, taking values from 0 to 2). These multivalued nodes  
242 allow for a more fine-grained encoding of the activation states of key morphogens and  
243 downstream components whose effects are dose-sensitive (nodes Nodal, Chordin, BMP2/4,  
244 Alk4/5/7, Alk2/3/6, Smad2/3/4, Smad1/4/5/8 in Fig. 3). For example, Nodal activity can  
245 either overcome (level 2) or be counteracted (level 1) by the inhibition of Lefty. Additionally,  
246 Nodal input node is represented by a quaternary variable, in order to distinguish expression  
247 levels from wild-type (level 1-2) versus gain-of-function (level 3) conditions. Second, the  
248 antagonism between the Nodal and BMP pathways is encoded as a reciprocal inhibition



249 between Smad2/3/4 and Smad1/4/5/8 (Fig. 3), which implements the competition of these  
250 signalling complexes for the shared molecule Smad4. Noteworthy, each of these two  
251 inhibitory interactions can be counteracted by an increased activity of the other antagonistic  
252 pathway, according to our dose-dependent competition hypothesis (this is encoded in the  
253 corresponding logical rules, see Table 1).

254

#### 255 Model stable states match experimental wild-type and morphant phenotypes.

256 To test our model, we ran simulations and compared the resulting stable states with the wild  
257 type pattern observed experimentally. We applied different sets of values for the input nodes,  
258 each set corresponding to a specific territory of the ectoderm (Table 1 and materials and  
259 methods). For the relevant combinations of active inputs, the resulting stable states are  
260 compared with the list of marker genes expected to be expressed in the corresponding  
261 territory, based on *in-situ* hybridization experiments. We first considered the combinations of  
262 inputs corresponding to early 32-cell stage embryos signalling (Fig. 5), which corresponds to  
263 the onset of specification of the ventral organiser, forming at the opposite side of the gradient  
264 of Panda mRNA (Haillet et al., 2015). This pattern is correctly recapitulated by the stable  
265 states obtained for the wild-type situation (Fig. 5). The resulting stable states were then used  
266 to specify the input conditions reflecting a later blastula stage, after diffusion and shuttling of  
267 zygotic factors have taken place (Fig. 5). Indeed, as multiple diffusion events occur, some  
268 model inputs expressed in one territory are active in a broader region for blastula simulations  
269 (Fig. 6). After some iterative refinements of the rules, model simulations qualitatively  
270 recapitulated the expression patterns expected for each individual territory (ventral, ciliary,  
271 dorsal) (Fig. 6). Hence, we can conclude that, the regulatory graph shown in Fig. 3  
272 supplemented by the logical rules of Table 1 are sufficient to specify the three main  
273 ectodermal D/V patterns of the sea urchin embryo.

274

275 To further validate and explore the properties of our model, we simulated loss- and gain-of-  
276 function experiments (mRNA or morpholino injection) by restricting the range of reachable  
277 levels for one or multiple node(s), e.g. to zero for a loss-of-function, or to a higher value for a  
278 gain-of-function (cf. material and methods). As in the wild-type conditions, we challenged  
279 our model by comparing the resulting stable states with the *in-situ* patterns observed  
280 following mRNA or Morpholino injection in the embryo at early stage. For seven of the eight  
281 morphants simulated, the model returned a unique single stable state in each region, which  
282 qualitatively matched experimental observations (Fig. 6).

283

284 In the cases of *nodal* Morphants and of *lefty* mRNA overexpression, the ventral cascade fails  
285 to be established, leading to the absence of both Nodal and BMP2/4 pathway activities, and  
286 to the presence of a default ciliary state in all the ectodermal cells. Following *nodal* mRNA  
287 overexpression, the competition between Smad2/3 and Smad1/5/8 for Smad4 turns in the  
288 advantage of the ventral cascade producing a fully ventralised embryo. The same pattern is  
289 obtained for the *lefty* Morpholino, because this perturbation impacts the diffusion-repression  
290 mechanism controlled by Lefty (Juan and Hamada, 2001), enabling *nodal* expression to  
291 propagate without restriction (Duboc et al., 2008). In the case of overexpression of the dorsal  
292 fate repressor *chordin*, or yet in the case of BMP morphants, the absence of BMP2/4  
293 signalling fosters a ciliary band state in the presumptive dorsal territory. However, as  
294 BMP2/4 is not necessary for the expression of *nodal*, the ventral cascade maintains a wild  
295 type expression pattern in these morphants. Finally, following *bmp2/4* overexpression, the  
296 competition for the common Smad is driven toward the activation of the dorsal cascade,  
297 giving a fully dorsalised ectoderm state.

298

299 Interestingly, in the case of the *chordin* morpholino, the model returned two stable states  
300 (denoted by two blue and green half circles at the bottom and left of Fig. 6) in the  
301 presumptive ventral region, corresponding to ventral and dorsal fates, respectively. This  
302 situation is further investigated using a probabilistic framework hereafter.

303

#### 304 Stochastic logical simulation of the *chordin* Morpholino

305 Using a probabilistic extension of the logical framework, one can unfold the temporal  
306 dynamics of the regulatory network for given initial conditions, and estimate the prevalence  
307 of a given cellular fate when the model predicts alternative stable states. In the case of the  
308 ventral region in *chordin* morphant conditions, we have seen that our model predicts two  
309 different stable states, corresponding to ventral and dorsal expression patterns. Using the  
310 software MaBoSS (<https://maboss.curie.fr>) (Stoll et al., 2017), we performed stochastic  
311 temporal simulations of our model to generate mean time plots and estimate the probability to  
312 reach each of these stable states. In the absence of precise kinetic information, we first used  
313 equal rates for all (up or down) transitions.

314

315 In the wild type ventral region, as expected, all stochastic simulations gave rise to a ventral  
316 expression pattern (Fig. 7A). In contrast, for the *chordin* morphant, the dorsal state is reached

317 about twice as often as the ventral state (Fig. 7B). In other words, the dorsal pathway is more  
318 likely to win the competition for Smad4. This partial dominance of the dorsal pathway  
319 matches the weak dorsal patterns observed experimentally for *chordin* morphants (Fig. 6),  
320 which presumably result from the co-activation of the two antagonistic pathways.

321 [Additionally, the prediction of a transient expression of ciliary genes in the ventral region](#)  
322 [\(Fig.7\) is further supported by experimental evidence from Saudemont et al. \(2010\).](#)

323

324 In the *chordin* morphants, BMP signalling diffuses unrestricted in the ventral ectoderm,  
325 promoting dorsal fates and repressing the ventral cascade. However, since Nodal is critically  
326 required for *bmp2/4* activation, *nodal* down-regulation in turn leads to the repression of  
327 BMP2/4 signalling. Therefore, in the absence of Chordin, both the ventral and dorsal  
328 cascades are activated. This conclusion is supported by the experimental observation of  
329 transient Smad1/5/8 signalling and *tbx2/3* expression in the ventral ectoderm (Lapraz et al.,  
330 2009).

331

332 To further assess whether this imbalance in favour of the dorsal pathway activation is  
333 sensitive to kinetic (transition) rates, we ran stochastic simulations with different Smad  
334 activation rates for the two pathways. An imbalance in favour of the dorsal Smad activation  
335 further increases the final proportion of dorsal fate compared to wild type (Fig. 7C). On the  
336 contrary, an imbalance in favour of the ventral Smad activation inverses the relationship, with  
337 a higher fraction of ventrally specified states compared to dorsally specified states, almost  
338 mirroring the ratios obtained with equiprobable transition rates (Fig. 7D).

339

340 [In conclusion, in the condition of a simultaneous activation of both ventral and dorsal](#)  
341 [cascades without inhibition \(i.e. \*chordin\* morphants\), the outcome of the competition between](#)  
342 [the BMP2/4 and Nodal pathways is at least partly driven by the kinetic rates of Smad](#)  
343 [activation. In such situation, the pathway-specific Smad firstly activated reaches more](#)  
344 [quickly a concentration level sufficient to repress the other pathway by pre-empting Smad4](#)  
345 [and thereby fosters the corresponding state stable.](#)

346

347 Multicellular simulations emphasise the crucial role of long-range signal diffusion

348 In the preceding section, we simulated the behaviour of cells for each of the three different  
349 presumptive territories by selecting appropriate combinations of signalling input levels,  
350 which were considered as fixed during the whole duration of the simulations. To model more

351 precisely the production and diffusion of signalling molecules across the ectoderm, we used  
352 the software EpiLog (<https://epilog-tool.org>) (Varela et al., 2019), which supports simulations  
353 of an epithelium encompassing multiple cells connected by diffusing signals. The behaviour  
354 of each cell of the epithelium is modelled by the same cellular logical model, but levels of  
355 input signals directly depend on the output signal values from neighbouring cells. The input  
356 signals perceived by a given cell are integrated into logical diffusion rules, which are updated  
357 synchronously during simulations (see Materials and methods and Table 2) (Fig. 8A).

358

359 To simulate the wild type situation, we initialised the model with a broad weak expression of  
360 *Nodal* and *Panda* expression in the presumptive ciliary and dorsal territories (corresponding  
361 to the six right-most range of cells), as observed experimentally (Haillet et al., 2015) (Fig.  
362 8B). The simulation correctly recapitulates the expected contiguous ventral, ciliary and dorsal  
363 ectoderm territories (Fig. 8C). This result suggests that the relatively simple diffusion rules  
364 properly account for the dynamics of the proteins governing the dorsal-ventral patterning. In  
365 addition, this result highlights the crucial role of *Nodal* to direct specification of the ectoderm  
366 along the whole dorsal-ventral axis. Interestingly, in the course of wild-type simulation, we  
367 can clearly distinguish the main steps of the D-V patterning, with the initial restriction of  
368 *Nodal* expression on the ventral side, followed by the diffusion of BMP2/4 signalling toward  
369 the dorsal side, until it activates the dorsal marker genes (see Fig. S1).

370

371 As in the case of the unicellular model, we can apply specific perturbations to assess their  
372 impact at the tissue level. As shown in Fig. 8C, our multicellular simulations accurately  
373 recapitulate the phenotypes of the different morphant patterns observed experimentally. Note  
374 that the *chordin* morpholino has been discarded from these simulations, as it gave rise to two  
375 different stable states, which cannot be properly simulated with the EpiLog deterministic input  
376 updating approach.

377

378 Using EpiLog, it is further possible to perform local perturbations by modifying the initial  
379 levels of one or several signalling molecules at specific epithelium locations. Using this  
380 feature, we could recapitulate in silico the results of an experiment reported by (Lapraz et al.,  
381 2015), who injected *nodal* mRNA into two opposite cells of a 4-cell stage *nodal* knock-down  
382 embryo (i.e. following a *nodal* Morpholino injection in the egg). This experiment triggered  
383 the formation of an ectopic, inverted D/V axis and resulted in the development of siamese  
384 pluteus larvae with two ventral sides, two ciliary bands and a central dorsal territory. Using

385 Epilog and imposing *nodal* and *smad2/3/4* activity at the initial state in both the ventral and  
386 the dorsal side of the epithelium, our spatial logical simulation qualitatively recapitulates the  
387 siamese pattern observed experimentally (Fig. 8D).

388

389

## 390 **Discussion**

391

392 Gene regulatory networks integrate documented interactions between transcription factors,  
393 signalling components, and their target genes, which ultimately translate the information  
394 encoded into the genome into morphological form and body plan. However, as our  
395 delineation of developmental systems progresses, we are facing increasingly large and  
396 complex networks, which cannot be fully and rigorously understood without proper  
397 formalisation. This is clearly the case for the GRN governing D/V patterning of the sea  
398 urchin embryo, which relies on numerous signalling and regulatory factors, involved in  
399 multiples positive and negative feedback circuits.

400

401 In our modelling study, several key choices had to be made. As little is known regarding  
402 detailed mechanisms and kinetic parameters, we opted for a qualitative, logical formalism.  
403 However, to properly model morphogen diffusion and dose-dependent effects, we considered  
404 a multilevel extension of the classical Boolean framework. Importantly, in the course of its  
405 conception, the model was systematically tested through extensive simulations of wild-type  
406 and perturbed conditions. In wild-type conditions, our unicellular model fully recapitulated  
407 each territory pattern independently. We further took advantage of a recent multicellular  
408 extension of the logical framework to explicitly simulate spatial pattern formation, whose  
409 results can be more easily compared directly with the phenotypes of wild-type and morphant  
410 embryos.

411

412 A key step in our study was to model the interplay between the Nodal and BMP pathways. In  
413 this respect, we were guided by our experiments dealing with the treatment of embryos with  
414 recombinant Nodal or BMP2/4 proteins at blastula stage (i.e. after the initial specification of  
415 the ventral and dorsal territories). These experiments demonstrated that over-activation of one  
416 of these pathways is sufficient to abrogate signalling from the other pathway. Consequently,  
417 our model highlights the strong antagonism between Nodal and BMP2/4 signalling and  
418 suggests that the outcome of this competition relies at least in part on the relative doses of the

419 two TGF- $\beta$ s, rather than or in addition to their timing of activation. We further suggest that  
420 the antagonism stems from a competition for the recruitment of Smad protein complexes.  
421 Although evidence for binding site of Smad complexes on the *cis*-regulatory regions of  
422 BMP2/4 and Nodal target genes has been described (Hill, 2016), the mechanism of  
423 competition between the two cascades has not been fully clarified yet to our knowledge and  
424 further experiments are needed to support and validate this hypothesis.

425

426 This competition between Nodal and BMP2/4 plays a key role in understanding the  
427 regulatory dynamics within the *chordin* knock-down experiments, which was the only  
428 morphant not fully recapitulated by our model for all three territories. In the case of the  
429 *chordin* knock-down, our logical model predicted that both the ventral and dorsal steady  
430 states were possible in the presumptive ventral region. Accordingly, in the *chordin* morphant,  
431 both the Nodal and the BMP2/4 pathways are activated, antagonising each other. Following  
432 this ectopic activation of BMP signalling, the ventral territory in *chordin* morphants displays  
433 a transient dorsalisation, before reversing towards a ventral ectoderm fate during gastrulation,  
434 as shown by the presence of a mouth opening. To further explore the underlying regulatory  
435 mechanism of this dorsal fate dominance, we performed a stochastic logical simulation of the  
436 unicellular model in *chordin* knock-down condition. This analysis resulted in a higher  
437 proportion of active dorsal fate over ventral fate, in agreement with the experiments. This  
438 result suggests that the transient dorsal dominance is encoded in the structure of the GRN.  
439 Indeed, even in the case of the *chordin* morphants, the model accurately recapitulates the  
440 conflict caused by the coactivation of the Nodal and BMP2/4 pathways in the ventral  
441 ectoderm. However, by modulating the rates associated with the different Smads and  
442 performing additional simulation, we showed that the outcome of the competition between  
443 the two pathways is sensitive to these rates in the context of co-activation.

444

445 At this point, our model remains limited to the major early dorsal-ventral patterning events  
446 occurring in sea urchin. However, this model could be tentatively extended in the future to  
447 integrate novel data and explore more refined specification and differentiation events. For  
448 example, it could be extended to investigate the specification of the boundary ectoderm  
449 region, located at the interface between the ectoderm and endomesoderm, which plays a  
450 central role in positioning the clusters of primary mesenchyme cells and spicules patterning  
451 (Armstrong and McClay, 1994; Armstrong et al., 1993; Duloquin et al., 2007; Hardin et al.,  
452 1992; Röttinger et al., 2008). This process is known to depend on Wnt signalling, presumably

453 in conjunction with Nodal, BMP2/4 and ADMP2 signalling (Lapraz et al., 2015; McIntyre et  
454 al., 2013; Röttinger et al., 2008; Saudemont et al., 2010). With the current unicellular model,  
455 the simulation with the input levels corresponding to the boundary ectoderm (i.e. Admp2 and  
456 Wnt active) results in a dorsal stable state (Fig. S2).

457

458 Another possible extension to the model would be the integration of the negative feedback of  
459 Smad6 on Nodal and BMP2/4 pathways (Armstrong and McClay, 1994; Armstrong et al.,  
460 1993; Duloquin et al., 2007; Hardin et al., 1992; Röttinger et al., 2008). Indeed, Smad6 is  
461 activated by the dorsal signalling downstream of BMP2/4. Such a negative feedback circuit  
462 typically generates an oscillatory behaviour. With the logical formalism, the consideration of  
463 this negative circuit would result in a cyclic attractor with alternation of active and inactive  
464 BMP and Smad6 activities, which are more difficult to interpret than stable states.

465

466 Our logical model focuses on the blastula and gastrula stages of sea urchin embryogenesis.  
467 One possible extension would be to further explore the regulatory interactions taking place at  
468 earlier stages. In the case of the 32-cell stage, our model correctly recapitulates wild-type  
469 pattern mainly driven by Panda expression. Furthermore, the simulation results of Panda loss-  
470 of-function in 32-cell stage conditions mirror the fully ventralised phenotype obtained  
471 experimentally (Haillet et al., 2015) (Fig. S3 A-B). However, the simulations of Panda  
472 overexpression show discrepancies relative to the experimental observations. Indeed, our  
473 model predicts a loss of ventral fate specification, whereas global injection of Panda mRNA  
474 does not impact the wild-type pattern. Current models suppose that an asymmetry of Panda  
475 mRNA provides the spatial cue that in turn controls the polarised activation of downstream  
476 genes. Therefore, an asymmetry of *panda* mRNA or of Panda protein constitutes the main  
477 driving signal to allocate cell fates, rather than a change in overall Panda concentration. Such  
478 signalling based on multicellular gradient cannot be currently recapitulated by our unicellular  
479 model, as it requires to integrate inputs from multiple surrounding cells and also to rely on  
480 relative differences in concentration instead of absolute levels. As relative concentration  
481 differences are tricky to model with the logical formalism, a continuous framework (e.g.  
482 ODE) would be better suited to further explore the specificities of such multicellular gradient  
483 signalling.

484

485 To conclude, using a qualitative, logical model, we could capture several salient dynamical  
486 features of the GRN governing the early dorsal-ventral patterning of sea urchin embryos,

487 including the key role played by intercellular interactions. Such qualitative models are useful  
488 to explore the interplay between maternal factors and zygotic genes, which orchestrates  
489 patterning of the ectoderm of the sea urchin embryo downstream of intercellular signals. To  
490 ease further model analyses and extensions, we provide our models as supplementary  
491 material, together with a Jupyter notebook implementing all the simulations performed with  
492 GINsim and MaBoss (see supplementary material), and a Docker image containing the  
493 necessary softwares (<https://github.com/colomoto/colomoto-docker>).

494

495

## 496 **Material and methods**

497

### 498 Animals, embryos and treatments

499 Adult sea urchins (*Paracentrotus lividus*) were collected in the bay of Villefranche-sur-Mer.

500 Embryos were cultured as described in (Lepage and Gache, 1989; Lepage and Gache, 1990).

501 Fertilization envelopes were removed by adding 1mM 3-amino-1,2,4 triazole (ATA) 1 min

502 before insemination to prevent hardening of this envelope followed by filtration through a 75

503  $\mu$ m nylon net. Treatments with recombinant BMP2/4 ([Recombinant Mouse BMP-4 Protein](#),

504 [CF 5020-BP/CF](#)) or Nodal ([Recombinant human Nodal protein 3218-ND-025/CF](#)) proteins

505 were performed at the time indicated in the schemes by adding the recombinant protein

506 diluted from stocks in 1 mM HCl in 24 well plates containing about 1000 embryos in 2 mL of

507 artificial sea water (Saudemont et al., 2010). [All the experiments described in this study have](#)

508 [been repeated two or three times. At least 200 wild-type and 50 injected embryos were](#)

509 [analysed for each condition or experiment. In the case of treatments with recombinant](#)

510 [proteins, more than 500 embryos were scored for morphological phenotypes for each](#)

511 [condition and about 250 embryos were used for in situ hybridisation. Only phenotypes](#)

512 [observed in more than 90% of the embryos are shown.](#)

513

### 514 Overexpression of mRNAs and morpholino injections



515 For overexpression studies, capped mRNAs were synthesized from NotI-linearized templates  
516 using mMessage mMachine kit (Ambion). After synthesis, capped RNAs were purified on  
517 Sephadex G50 columns and quantitated by spectrophotometry. The *nodal*, *lefty*, *chordin* and  
518 *bmp2/4* pCS2 constructs have been described in Duboc et al. (2004, 2008) and Lapraz et al.  
519 (2009). In this study, *nodal* mRNA was injected at 400 µg/ml, *lefty* mRNA at 200 µg/ml,  
520 *chordin* mRNA at 1000 µg/ml and *bmp2/4* mRNA at 500 µg/ml, respectively. Approximately  
521 2-4µL of capped mRNA were injected mixed with Tetramethylrhodamine Dextran (10000  
522 MW) at 5 mg/ml (Duboc et al., 2004). Morpholino oligonucleotides were dissolved in sterile  
523 water together with Tetramethylrhodamine Dextran (10000 MW) at 5 mg/ml and  
524 approximately 2-4µL of the resulting solution was injected at the one-cell stage. *nodal*  
525 morpholino was used at 1mM (Duboc et al., 2004). *chordin* and *bmp2/4* morpholinos were  
526 injected at 1mM and 0.2mM, respectively (Lapraz., et al 2009), *lefty* morpholino at 1.5mM  
527 (Duboc et al., 2008) and *panda* morpholino at 1.2mM (Haillet et al., 2015).

528

#### 529 Anti-phospho-Smad1/5/8 Immunostaining

530 Embryos were fixed with 4% formaldehyde for 15 min at swimming blastula stage (3 hours  
531 after adding BMP2/4 protein) then briefly permeabilized with methanol. Anti-Phospho-  
532 Smad1 (Ser463/465) / Smad5 (Ser463/465) / Smad9 (Ser465/467) from Cell Signalling  
533 (D5B10 Ref. 13820) was used at 1/400. Embryos were imaged with an Axio Imager.M2  
534 microscope.

535

#### 536 In situ hybridization

537 *In situ* hybridization was performed using standard methods (Harland, 1991) with DIG-  
538 labelled RNA probes and developed with NBT/BCIP reagent. The *nodal*, *chordin* and *tbx2/3*  
539 probes have been described previously (Duboc et al., 2004; Lapraz et al., 2009). Control and  
540 experimental embryos were developed for the same time in the same experiments. Embryos  
541 were imaged with an Axio Imager M2 microscope.

542

#### 543 Logical formalism

544 We built our model using the multilevel logical formalism introduced by R. Thomas (Thomas  
545 and D’Ari, 1990). This qualitative approach relies on graph-based representations of the  
546 network and of its dynamics. The network is formalised as a *regulatory graph*, where nodes  
547 denote molecular species (e.g. proteins), whereas signed arcs denote regulatory interactions,  
548 positive or negative. The nodes can take a limited number of integer values, only two (0 or 1)  
549 in the simplest, Boolean case, but potentially more when biologically justified, for example in  
550 the case of morphogens with clearly distinct activity ranges. Hence, each regulatory arc is  
551 associated with an integer threshold, always 1 in the Boolean case, but potentially higher in  
552 the case of a multilevel regulator. Logical rules further specify how each node reacts to the  
553 presence or absence of the corresponding incoming interactions. Specific (non-overlapping)  
554 Boolean rules are defined for each value of each node.  
555 Boolean rules are built by combining literals (i.e. valued component) with the logic operators  
556 AND (denoted “&”), OR (denoted “|”) and NOT (denoted “!”).  
557 Table 1 lists the formula associated with the different components of our model.  
558 Note that the formula associated with zero values are omitted, as they can be computed  
559 directly as the complement of the formulae defined for the other values for a given node.  
560 For example, the formula of the node FoxA  
561 
$$\text{FoxA} \Rightarrow 1 \text{ IFF } (\text{FoxA} | \text{Brachyury}) \& \text{!Repressor\_R1}$$
  
562 can be translated into “FoxA node tends toward the value 1 if and only if FoxA or Brachyury  
563 is active and Repressor\_R1 is not active”.  
564 In this example, the regulatory actions from Brachyury to FoxA and from Repressor\_R1 to  
565 FoxA correspond to an activation and to an inhibition, respectively.  
566 The levels of the input (unregulated) nodes are defined at the start of simulations.  
567 Using the Boolean rules of Table 1, we can simulate the behaviour of the system for different  
568 input value combinations. In this respect, we use the asynchronous updating approach  
569 proposed by R. Thomas (Thomas, 1991), which consists in following all the different  
570 possible single unitary changes of values induced by the rules.  
571 The dynamical behaviour of the model is generally represented in terms of a *state transition*  
572 *graph*, where each node represents a discrete state of the model (i.e. a vector listing the  
573 values of the different components of the model), whereas each arc represents a state  
574 transition.  
575 In this work, we took advantage of the implementation of this logical formalism into the user-  
576 friendly Java software suite GINsim (version 3.0, see <http://ginsim.org>, (Naldi, 2018)). In our  
577 analyses, we particularly focused on stable states (see e.g. Fig. 5B), which typically denote

578 cell differentiation states. These can be directly computed (i.e. without unfolding the state  
579 transition graph) using a very efficient algorithm implemented in GINsim (Naldi et al., 2007).

580

#### 581 Wild type simulation

582 We simulated the behaviour of each dorsal-ventral region independently, considering  
583 different sets of fixed values for the input nodes in the ventral, ciliary and dorsal presumptive  
584 territories. [These sets of input values were defined based on previously published results \(see](#)  
585 [Results section\)](#). To account for their transient activity, the input nodes for Panda and Admp2  
586 [were defined as having a basal value of 0, enabling them to turn off during the simulation if](#)  
587 [active in the initial state conditions.](#)

588

589 As we simulate each territory individually, the unicellular model cannot directly take into  
590 account the diffusion of morphogens, which are therefore specified as input levels (e.g. the  
591 presence of Lefty is considered as an active input in the ciliary regions, although it is known  
592 that it diffuses from the ventral region). For each simulation, we extract the resulting stable  
593 state(s) and classify them as ventral, ciliary or dorsal pattern depending on the set of output  
594 node levels. For example, the initial conditions for the simulation of the ventral ectoderm  
595 territory amount to consider the [inputs Nodal \(level 2\), Lefty, Admp1, Tolloid, Chordin \(level](#)  
596 [2\) and BMP2/4 as active](#) (while the other inputs are inactive). This combination results in a  
597 stable state with all the ventral nodes active and the dorsal nodes inactive. In contrast, when  
598 the initial [conditions are set with Nodal \(level 1\), Lefty, BMP2/4, Chordin \(level 1\) and](#)  
599 [Tolloid](#) being active (and the other inputs inactive), the resulting stable state corresponds to  
600 the dorsal fate.

601

#### 602 Morphant simulations

603 Genetic perturbations are defined in GINsim by constraining the values of selected nodes of  
604 the model. To simulate a *knock down* morphant (e.g. injection of a morpholino), the level of  
605 the corresponding node is set and maintained to 0. In the case of an ectopic expression (e.g.  
606 injection of a mRNA), the level of the corresponding node is set and maintained to its  
607 maximal value, which can be 1 or higher in case of a multilevel node. Morphogen diffusion is  
608 taken into account through the specifications of proper input values, which thus need to be  
609 adjusted for each morphant. For example, the ectopic activation of Nodal is known to induce  
610 the activation of its downstream target BMP2/4 very early on; hence, the corresponding input  
611 variables must be set at their highest levels for the simulation of ectopic nodal expression.

612

### 613 Stochastic modelling using MaBoss

614 When several stable states can be reached (as in the case of *chordin* morpholino), we have  
615 performed probabilistic simulations to evaluate the probability to reach each of these stable  
616 states from the specified initial conditions. In this respect we used the software MaBoss  
617 (<https://maboss.curie.fr>), a C++ software enabling the simulation of continuous/discrete time  
618 Markov processes, applied to Boolean networks. The original unicellular model is converted  
619 into the MaBoSS compliant format using a specific export functionality of GINsim, which  
620 involves the replacement of multilevel nodes by sets of Boolean variables, without affecting  
621 the model dynamic (Stoll et al., 2017). Per default, all up and down rates are considered  
622 equal, but these can be modified at will.

623 In this study, we used MaBoSS to simulate the *chordin* morpholino perturbation (comparing  
624 it with the wild-type situation), which resulted in two possible stable states in the unicellular  
625 model. The inputs were fixed as for the ventral configuration (Nodal, Lefty, BMP2/4 and  
626 Admp1 active) in the presence or inactivation of Chordin. We then modified the propensity to  
627 activate the ventral or the dorsal cascade by adjusting the ratios of the rates assigned to the  
628 Alk receptors corresponding to each of the two cascades: 0.5/0.5 (equiprobable rates),  
629 0.75/0.25 (ratio favouring the dorsal Alk), 0.25/0.75 (ratio favouring the ventral Alk).

630

### 631 Multicellular simulation using EpiLog

632 We took advantage of recent software EpiLog (<https://epilog-tool.org>, v1.1.1.) (Varela et al.,  
633 2019) to perform multicellular simulations. Our epithelium model is **nine cells wide and six  
634 cells long**, made of hexagonal shaped cells, each one being in direct contact with at most six  
635 different neighbouring cells. The top and bottom part of the epithelium are wrapped together  
636 to allow diffusion of signalling molecules through these two sides. **Each hexagonal cell  
637 encompasses one copy of our unicellular model and thus behave accordingly to the same  
638 logical rules during simulations. In contrast with our previous unicellular simulations, the cell  
639 inputs are dynamically updated based on the signals perceived from the corresponding output  
640 nodes of neighbouring cells (e.g. Nodal input level will be based on the quantity of neighbour  
641 cells expressing Nodal as an output).** The rules integrating the extracellular signals are  
642 identical for all cells of the epithelium. In our epithelium simulations, input nodes of all cells  
643 are updated in a synchronous manner. Hence, each epithelium simulation gives rise to a  
644 deterministic trajectory ending in a single attractor at the level of the whole tissue (a stable  
645 state for the simulations reported here).

646

647 The dynamical update of the input node levels implies the definition of additional logical  
648 rules for the diffusion of signals, e.g. of the values of input nodes depending on the output  
649 nodes active in neighbouring cells, taking into account their distance from the target cell. For  
650 example, the rule “{Nodal:2[1:], min = 1}” states that a cell will have its Nodal input node  
651 value converging toward the value 1 if at least 1 cell is expressing Nodal at a value 2 at a  
652 minimum distance of one cell (i.e. all cell except the target cell itself).

653

#### 654 Multicellular wild type and morphant simulations

655 For our epithelium simulations, we define the initial state by selecting the nodes that will be  
656 active in a specific set of cells at the start of the simulation. During simulations, the values of  
657 these nodes can change depending on the model state and on paracrine signalling. To  
658 simulate a wild-type embryo, we set the model to an initial state where nodal is broadly  
659 expressed at a moderate level (level 1), and where panda is expressed in the presumptive  
660 ciliary and dorsal territories (6 rightmost cell columns of the epithelium), with the initial and  
661 transient activation of Panda and Nodal (output) nodes. Univin is also ubiquitously present at  
662 initial state. As in the unicellular simulation, to simulate loss- or gain-of-function  
663 perturbations, the value of the corresponding node is set and maintained at a fixed value.  
664 For the siamese simulation, we use the wild-type logical model, with an initial state  
665 accounting for a ventral expression of Smad1/4/5/8 and Nodal on the ventral side, but also on  
666 the dorsal side of the epithelium (1 rightmost cell column of the epithelium), i.e. a  
667 symmetrical activity pattern.

668

#### 669 Model and code availability

670 The unicellular and multicellular models are available in the GINsim model repository  
671 (<http://ginsim.org/node/236>), together with the Jupyter notebook encoding all the simulations  
672 performed with GINsim and MaBoss, which is also available in a GitHub repository  
673 ([https://github.com/ComputationalSystemsBiology/echinodal\\_notebook](https://github.com/ComputationalSystemsBiology/echinodal_notebook)). The Jupyter  
674 notebook uses the colomoto-docker image (<https://github.com/colomoto/colomoto-docker>,  
675 v2020-01-24) (Naldi et al., 2018). The models can be uploaded in zginml and peps format, to  
676 be open with GINsim (v3.0.0b) and EpiLog (v1.1.1), respectively. The unicellular model has  
677 been further deposited in SBML qual format in the BioModels database (ID  
678 MODEL2002190001), together with its reference annotations.

679 **A - Input nodes**

| Node    | Value ventral | Value ciliary | Value dorsal |
|---------|---------------|---------------|--------------|
| Nodal   | 2             | 1             | 1            |
| Lefty   | 1             | 1             | 1            |
| Panda   | 0             | 0             | 0            |
| Admp1   | 1             | 1             | 1            |
| BMP2/4  | 1             | 1             | 1            |
| Chordin | 2             | 2             | 1            |
| Tolloid | 1             | 1             | 1            |
| Wnt     | 0             | 0             | 0            |
| Admp2   | 1             | 1             | 1            |

680 **B – Internal nodes**

| Node         | Value | Logical rule                                                                            | Expression | Initial level |
|--------------|-------|-----------------------------------------------------------------------------------------|------------|---------------|
| Univin       | 1     | !Smad1/4/5/8:2                                                                          | Ventral    | 1 (basal)     |
| Alk4/5/7     | 1     | (Nodal:1 & !Lefty & Univin & !Panda)   (Nodal:2 & Univin & !Panda)                      | Ventral    | 0             |
| Alk4/5/7     | 2     | Nodal:3 & Univin                                                                        | Ventral    | 0             |
| Smad2/3/4    | 1     | Alk4/5/7:1 & !Smad1/4/5/8                                                               | Ventral    | 0             |
| Smad2/3/4    | 2     | Alk4/5/7:2                                                                              | Ventral    | 0             |
| Nodal        | 2     | Smad2/3/4                                                                               | Ventral    | 0             |
| Bmp2/4       | 1     | Smad2/3/4:1                                                                             | Ventral    | 0             |
| Bmp2/4       | 2     | Smad2/3/4:2                                                                             | Ventral    | 0             |
| Lefty        | 1     | Smad2/3/4                                                                               | Ventral    | 0             |
| Chordin      | 2     | Smad2/3/4                                                                               | Ventral    | 0             |
| Admp1        | 1     | Smad2/3/4 & !Smad1/4/5/8                                                                | Ventral    | 0             |
| Goosecoid    | 1     | Smad2/3/4                                                                               | Ventral    | 0             |
| Repressor R1 | 1     | !Goosecoid                                                                              | Dorsal     | 0             |
| FoxA         | 1     | (FoxA   Brachyury) & !Repressor_R1                                                      | Ventral    | 0             |
| Brachyury    | 1     | !Repressor_R1   FoxA                                                                    | Ventral    | 0             |
| Alk1/2/3/6   | 1     | ((Bmp2/4:1 & Admp1 & !Chordin)   (Bmp2/4:1 & Admp1 & Tolloid & !Chordin:2)) & !Bmp2/4:2 | Dorsal     | 0             |
| Alk1/2/3/6   | 1     | ((Admp2 & !Chordin)   (Admp2 & Tolloid & !Chordin:2)) & !Bmp2/4:2                       | Dorsal     | 0             |
| Alk1/2/3/6   | 2     | Bmp2/4:2                                                                                | Dorsal     | 0             |
| Smad1/4/5/8  | 1     | Alk1/2/3/6:2 & Smad2/3/4:2                                                              | Dorsal     | 0             |
| Smad1/4/5/8  | 2     | (Alk1/2/3/6:2 & !Smad2/3/4:2)   (Alk1/2/3/6:1 & !Smad2/3/4)                             | Dorsal     | 0             |
| Tbx2/3       | 1     | Smad1/4/5/8:2                                                                           | Dorsal     | 0             |
| IrxA         | 1     | Tbx2/3                                                                                  | Dorsal     | 0             |
| Glypican5    | 1     | Smad1/4/5/8:2                                                                           | Dorsal     | 0             |
| Frz          | 1     | Wnt                                                                                     | Dorsal     | 0             |
| Admp2        | 1     | Frz   Smad1/4/5/8:2                                                                     | Dorsal     | 0             |
| FGFA         | 1     | !Smad2/3/4 & !Smad1/4/5/8:2                                                             | Ciliary    | 1 (basal)     |
| Onecut       | 1     | !(IrxA   Goosecoid   Smad2/3/4)                                                         | Ciliary    | 1 (basal)     |

681

682 **Table 1. Logical rules of the unicellular model.**

683 Logical rules are used to define the behaviour of each node, for each territory, relative to its  
684 direct upstream regulatory nodes. Input nodes (A) do not have any assigned rules, as they are  
685 set to a given fixed value specific for each territory when performing simulations ([value  
686 shown for late stage simulation](#)). For the internal nodes (B), the table lists the logical rule  
687 required to reach non zero levels, as well as the wild-type initial level. [All nodes have their  
688 basal level set to 0 \(inactive\), excepting Univin, FoxA and FGFA \(basal level 1\), as they tend  
689 to be ubiquitously active without the need of explicit activators.](#) The logical rules combine  
690 literals, each representing the activity of one node, with the Boolean operators OR (“|”), AND  
691 (“&”) and NOT (“!”).

692

| Node    | Value | Logical diffusion rule                                                              | Interpretation                                                                                                                                             |
|---------|-------|-------------------------------------------------------------------------------------|------------------------------------------------------------------------------------------------------------------------------------------------------------|
| Admp1   | 1     | {Admp1[0:], min = 1}                                                                | Admp1 takes level 1 if a least one cell express Admp1 with no distance restriction                                                                         |
| Bmp2/4  | 1     | {Bmp2/4[0:], min = 1} & !{Bmp2/4:2[0], min = 1}                                     | Bmp2/4 takes level 1 if at least one cell express Bmp2/4 with no distance restriction and the cell does not already express Bmp2_4 at level 2              |
| Bmp2/4  | 2     | {Bmp2/4:2[0], min = 1}                                                              | Bmp2/4 takes level 2 if the cell already express Bmp2/4 at level 2                                                                                         |
| Chordin | 1     | {Chordin:2[0:], min= 1} & !{Chordin:2[0:3], min = 1}                                | Chordin takes level 1 if at least one cell express Chordin at level 2 among its neighbours at a distance higher than two cells                             |
| Chordin | 2     | {Chordin:2[0:2], min = 1}                                                           | Chordin takes level 2 if at least one cell express Chordin at level 2 among the cell itself and its neighbours at a distance equal or lower than two cells |
| Lefty   | 1     | {Lefty [0:], min=1}                                                                 | Lefty takes level 1 if at least one cell express Lefty at level 1 among the cell itself and its neighbours.                                                |
| Nodal   | 1     | {Nodal:2[0:1], min = 1, max = 2}   ({Nodal:1[0], min = 1} & !{Nodal:2[0], min = 1}) | Nodal takes level 1 if at one cell express Nodal at a minimum level 2 among the cell itself and its direct neighbours                                      |
| Nodal   | 2     | {Nodal:2[0], min = 1}                                                               | Nodal takes level 2 if the cell already express Nodal at level 2                                                                                           |
| Nodal   | 3     | No function                                                                         | Nodal cannot take level 3 by diffusion                                                                                                                     |
| Admp2   | *     | No function                                                                         | No Admp2 diffusion                                                                                                                                         |
| Tolloid | *     | No function                                                                         | No Tolloid diffusion                                                                                                                                       |
| Panda   | *     | No function                                                                         | No Panda diffusion                                                                                                                                         |
| Wnt     | *     | No function                                                                         | No Wnt diffusion                                                                                                                                           |

693

694 **Table 2. Logical diffusion rules used in Epilog.**

695 Logical rules are used to define the diffusion dynamics perceived by the input nodes,  
 696 depending on the values of the output nodes in the neighbouring cells. Diffusion rules are  
 697 defined in the format “{N:L[D],S}”, with N as the node with perceived diffusing signal, L its  
 698 required activation level, D the distance range to perceive diffusion and S the minimum  
 699 and/or maximum number of cell required in this state. For example, the fifth row specifies  
 700 that cells will have their Chordin input node value converging toward the value 2 if at least 2  
 701 cells are expressing Chordin at a value 2 at a maximum distance of three cell.



**Figure 1**

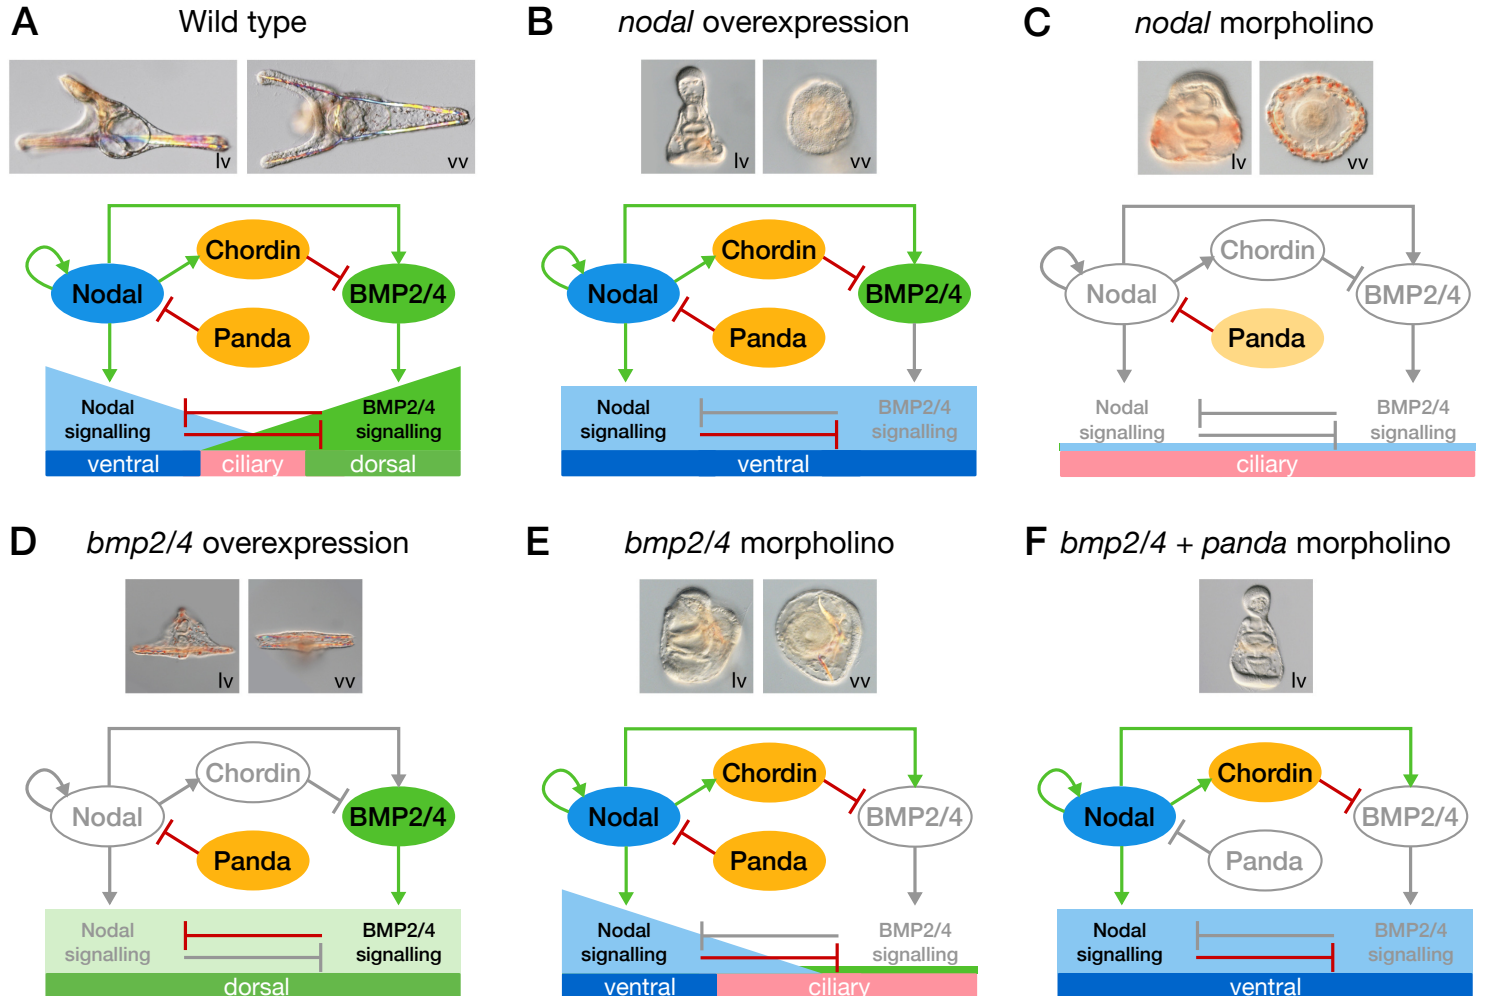

702 **Figure 1. Panda, Nodal and BMP signalling direct patterning of the Dorsal/Ventral axis**  
703 **of the sea urchin embryo.**

704 Summary of the morphological phenotypes and identity of the ectodermal territories of wild-  
705 type (control) embryos and embryos following perturbations of Nodal or BMP signalling.  
706 (A) In control embryos, the balance between Nodal and BMP signalling patterns the  
707 ectoderm in three main territories: Nodal signalling specifies the ventral ectoderm, BMP  
708 signalling specifies the dorsal ectoderm, while a ciliary band develops at the interface  
709 between them. (B) The whole ectoderm differentiates into ventral territory when *nodal* is  
710 overexpressed. (C) Both Nodal and BMP24 signalling are absent in Nodal morphants, which  
711 give rise to an expanded large ciliary band. (D) Following BMP2/4 overexpression, all the  
712 ectoderm acquires dorsal identity. (E) In contrast, after BMP2/4 inhibition, ventral territories  
713 are not perturbed but an ectopic ciliary band develop in place of the presumptive dorsal  
714 ectoderm. (F) Simultaneous perturbation of both the TGF- $\beta$  Panda and BMP2/4 signalling  
715 allows the expansion of Nodal signalling to the whole territory and the ventralisation of the  
716 ectoderm. The genes, proteins or interactions that are inactive following each perturbation are  
717 denoted in light grey. Activation and inhibition interactions are respectively shown by green  
718 and red arrows. lv, lateral view. vv, vegetal view.

**Figure 2**

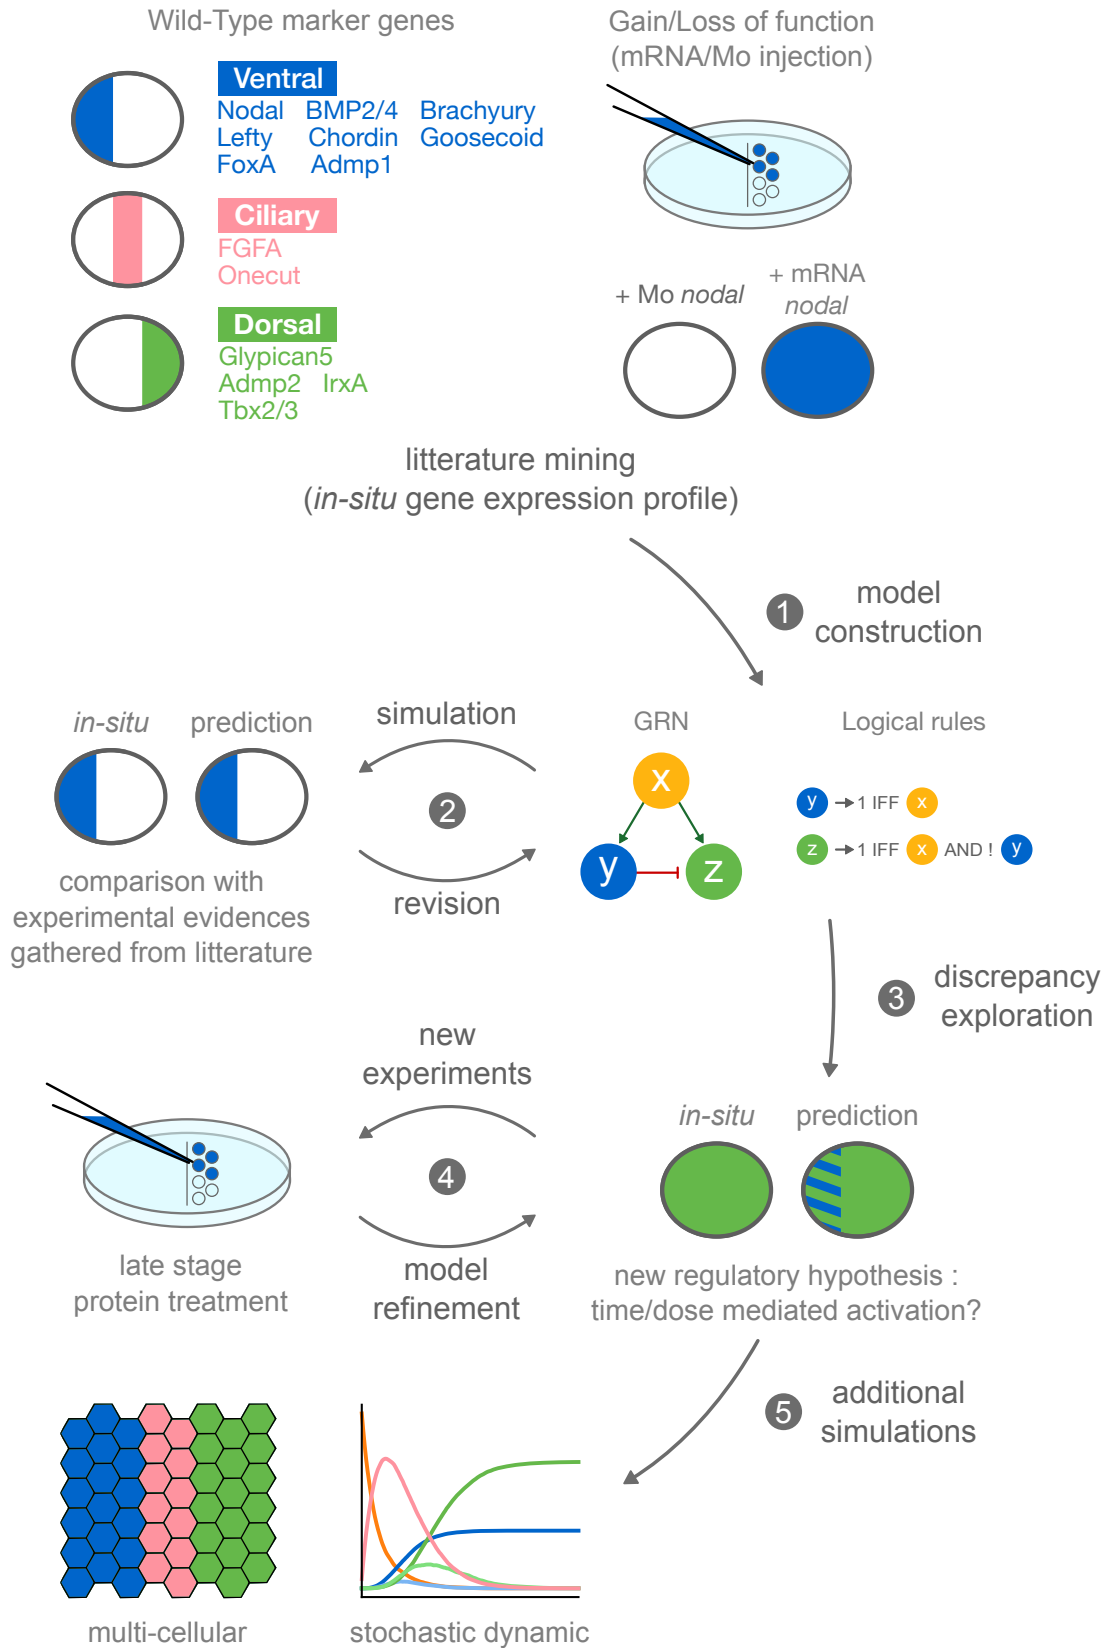

719 **Figure 2. Iterative integration of biological data into the GRN model.**

720 The GRN model has been built through an iterative process. A first version based on  
721 literature curation and experimental evidence was set and then simulated in wild type and  
722 perturbation conditions. The results of wild-type and morphant simulations were  
723 systematically compared with experimental results. In case of discrepancy, the regulatory  
724 graph and the logical rules were refined, and the behaviour of the model was then re-  
725 examined through the same process (1-2). Following this iterative process, the unsolved  
726 discrepancies were explored by novel experiments designed to test the different regulatory  
727 hypotheses of the model (3-4). The final model was then further extended and analysed using  
728 additional tools (MaBoSS for stochastic simulations, EpiLog for multicellular simulations).

**Figure 3**

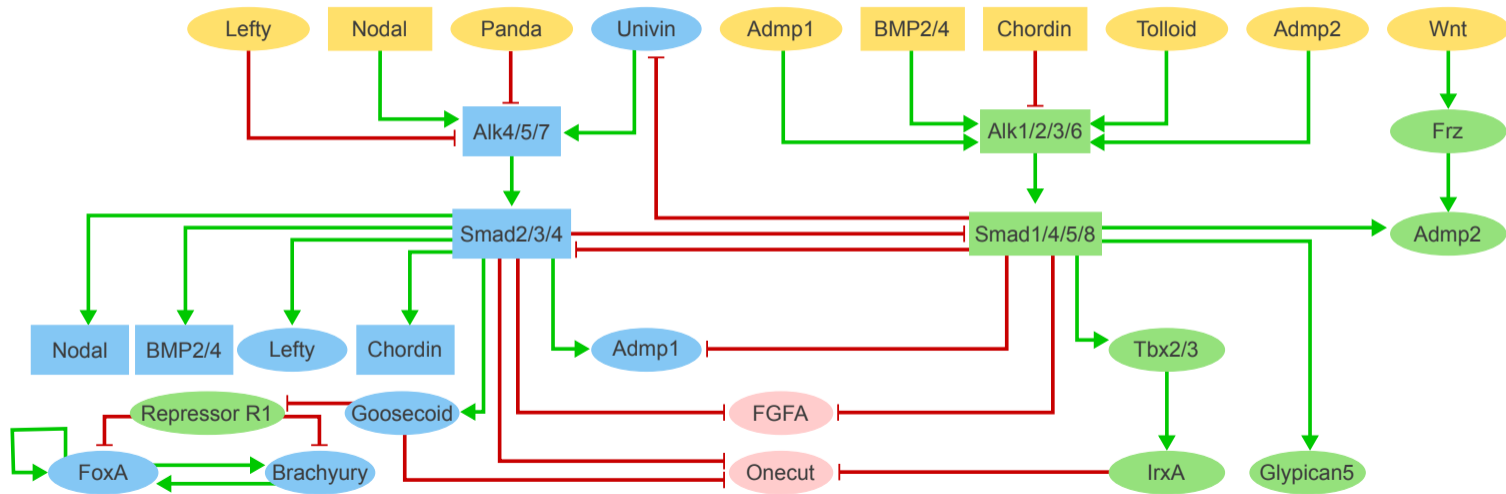

729 **Figure 3. Logical model integrating the main signalling pathways controlling the early**  
730 **dorsal-ventral axis specification in the sea urchin *Paracentrotus lividus* embryo.**

731 Relying on a logical formalism, this model was defined and analysed using the software  
732 GINsim. Green and red arrows represent activations and repressions, respectively. Ellipsoid  
733 and rectangular components represent Boolean and multivalued components, respectively.  
734 The components in yellow correspond to model inputs. Internal components are coloured  
735 according to their domain of expression along the dorsal-ventral axis, i.e. dorsal (green),  
736 ventral (blue) or ciliary (pink) regions.

**Figure 4**

**A**

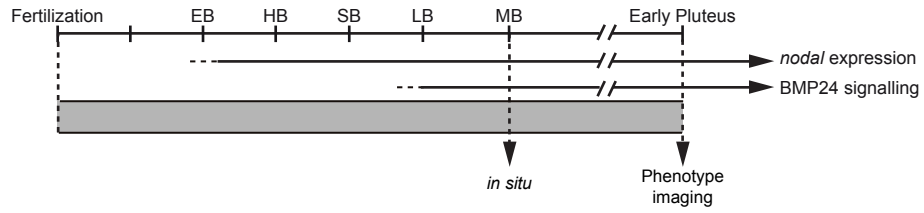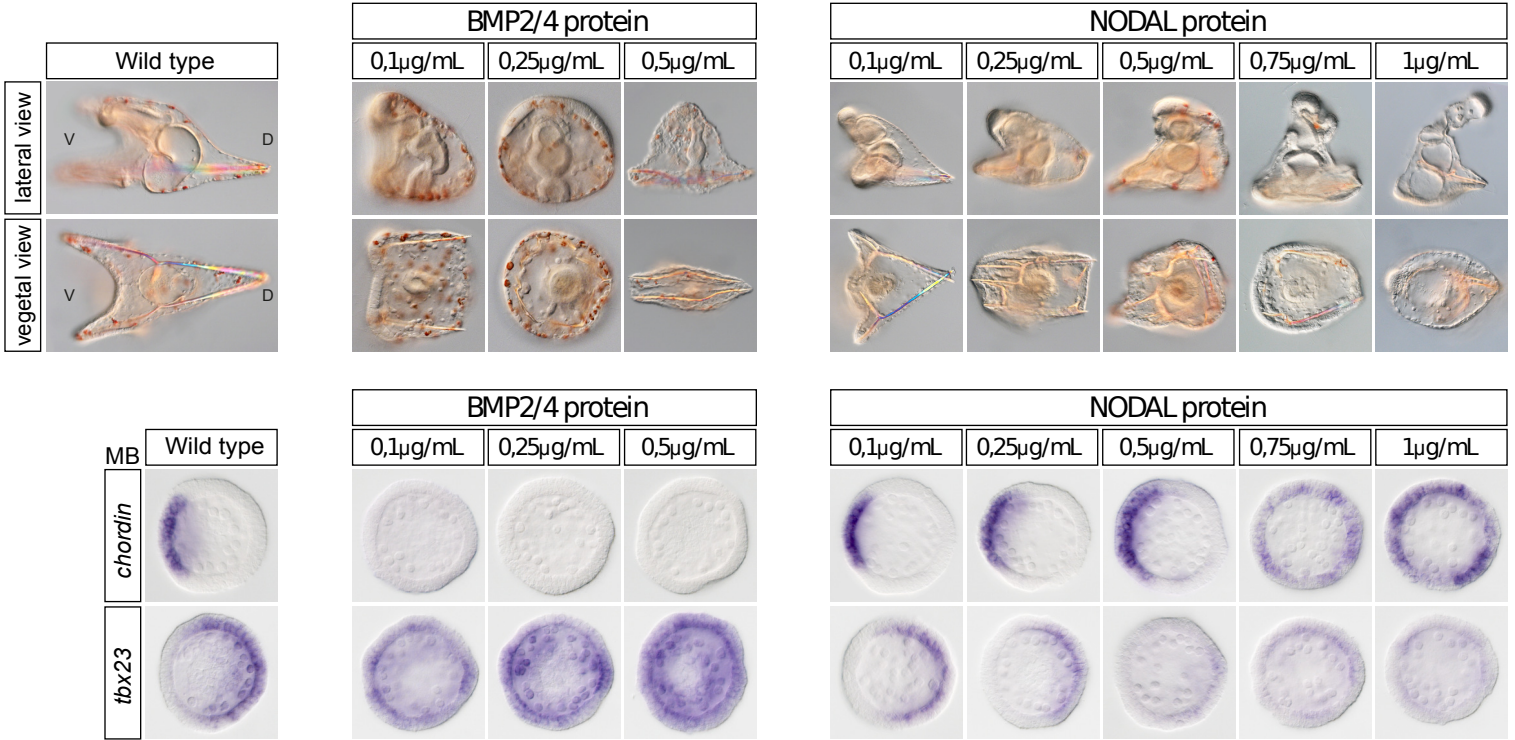

**B**

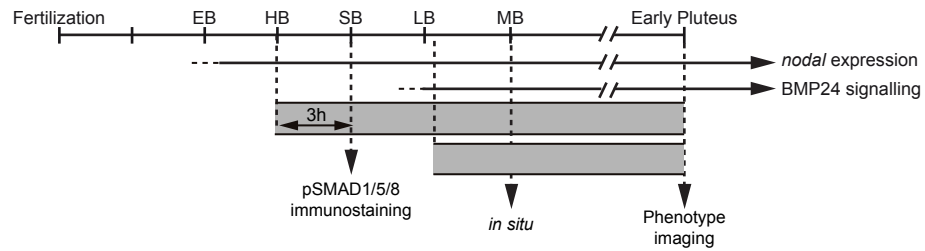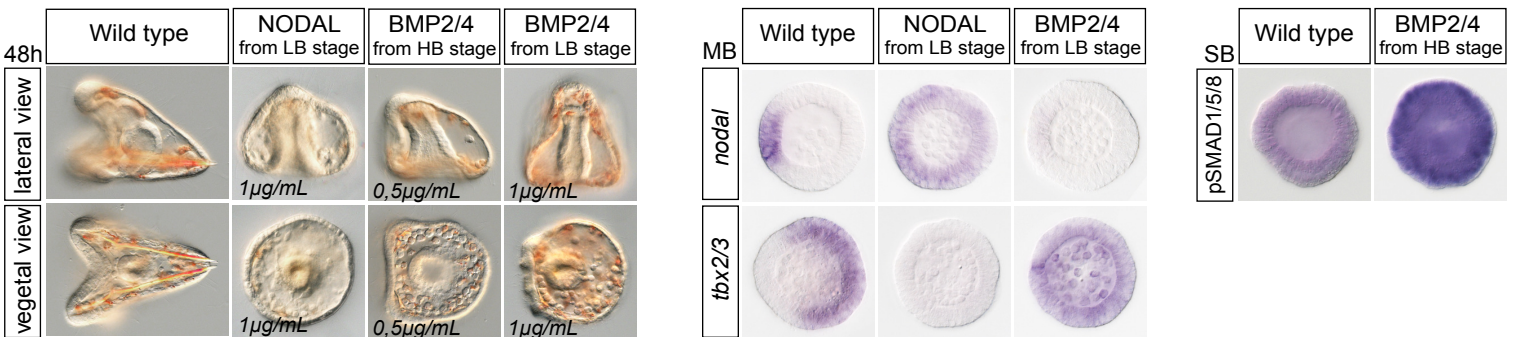

737 **Figure 4. BMP and Nodal signalling antagonize each other to pattern the D/V axis of the**  
738 **sea urchin embryo.**

739 (A) Continuous Nodal and BMP2/4 protein treatments at increasing concentrations from the  
740 fertilized egg stage. Increasing concentrations of BMP2/4 protein treatment progressively  
741 dorsalis the embryo at expenses of the ventral territories, as reflected by the expansion of  
742 the expression of the dorsal marker *tbx2/3* and the repression of the expression of the ventral  
743 marker *chordin*. On the other hand, increasing concentrations of Nodal protein treatment  
744 gradually ventralises the embryo at the expenses of the dorsal territories as reflected by the  
745 gradual expansion of the expression of the ventral marker *chordin* and the repression of the  
746 expression of the dorsal marker *tbx2/3*.

747 (B) Three hours Nodal or BMP2/4 protein treatments at late blastula and hatching blastula  
748 stages are sufficient to cross-antagonise each other signalling. Three hours Nodal protein  
749 treatment at late blastula stage results in rounded-shaped embryos partially ventralised that  
750 overexpress the ventral marker *nodal* at the expenses of the dorsal marker *tbx2/3*.

751 Complementary, three hours BMP2/4 protein treatment at hatching or late blastula stages  
752 promotes massive pSMAD1/5/8 signalling and results in partially dorsalised embryos that  
753 overexpress the dorsal marker *tbx2/3* at the expenses of the ventral marker *nodal*. EB, Early  
754 Blastula; HB, Hatching Blastula; SB, Swimming Blastula; LB, Late Blastula; MB,  
755 Mesenchyme Blastula; V, Ventral; D, Dorsal.



**Figure 5**

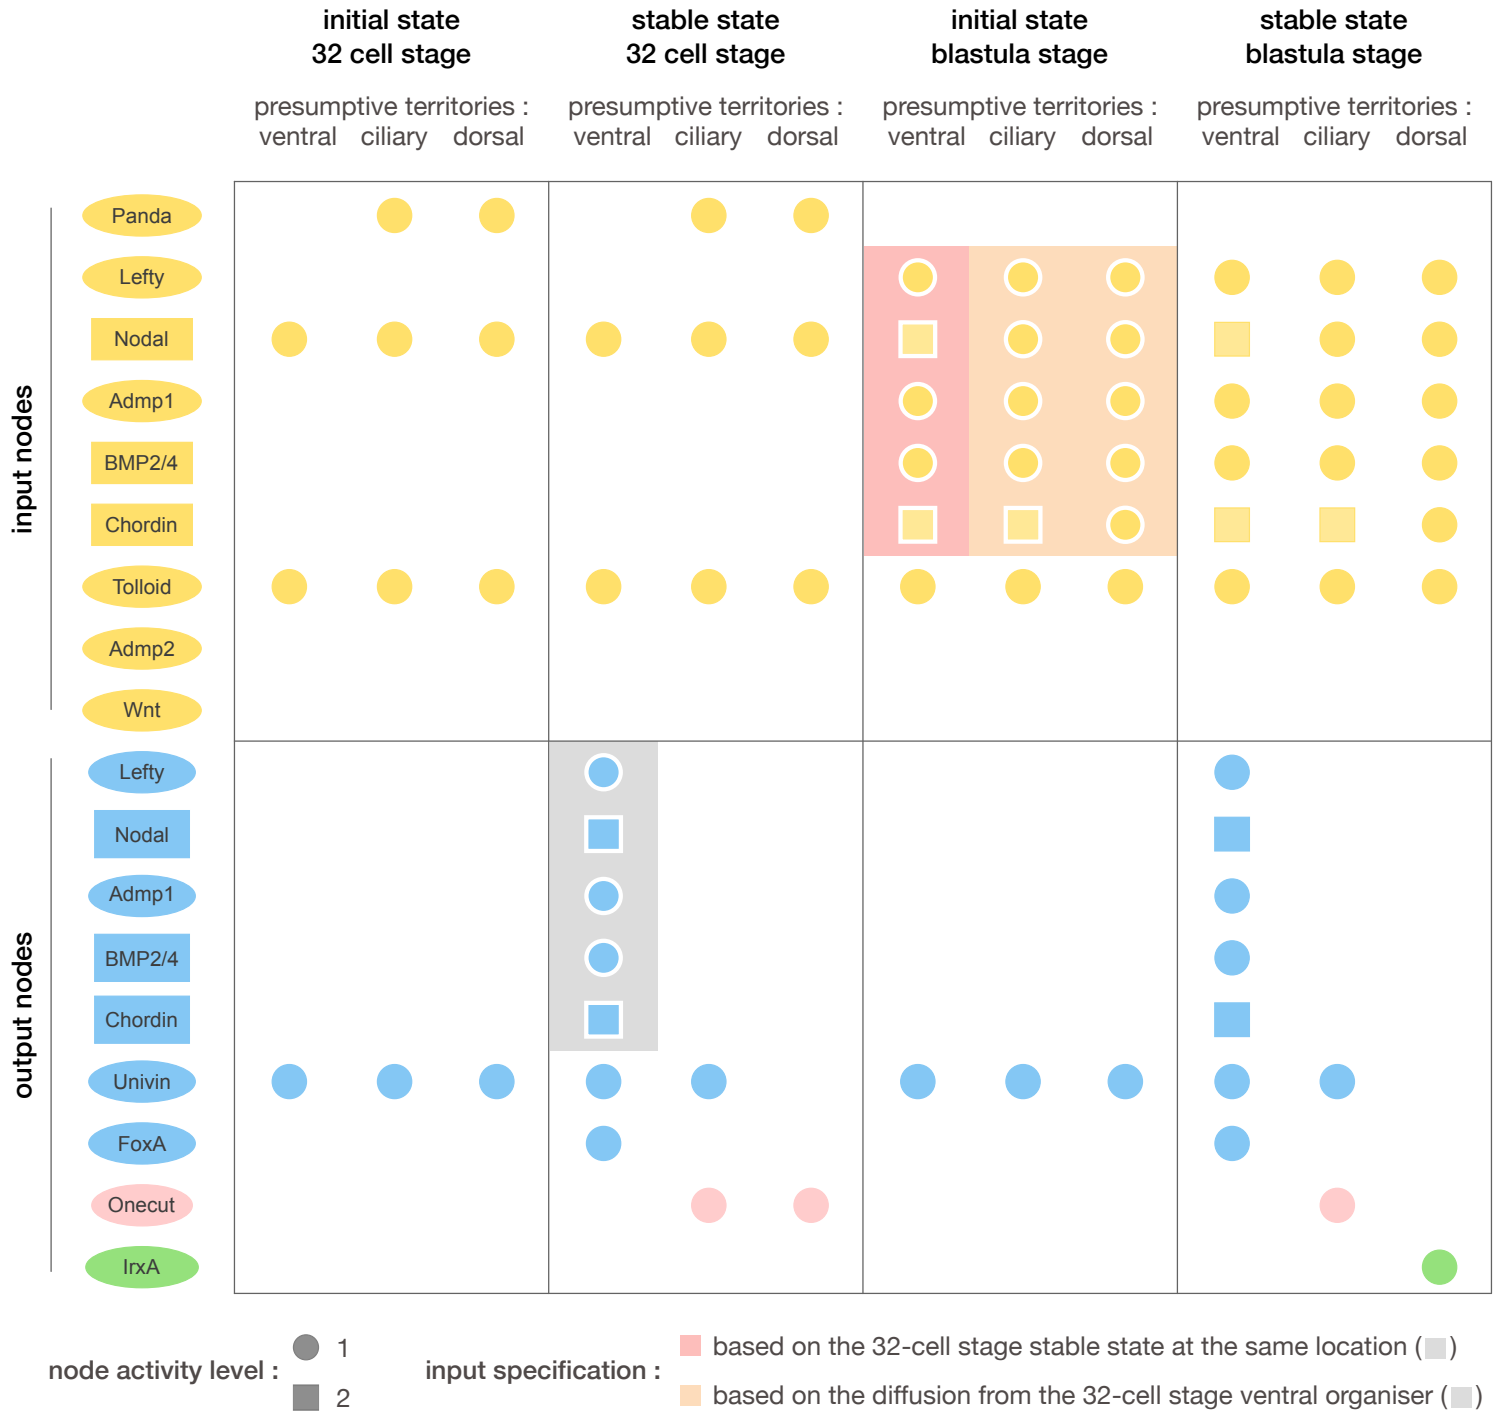

756 **Figure 5. Simulation of early 32-cell stage and specification of later stage inputs.**

757 By restricting the active input nodes to combinations of Nodal, Panda and Tolloid (1st  
758 column), our unicellular model recapitulates the wild-type patterns observed in the 32-cell  
759 stage embryos (2nd column), where *panda* is expressed in the presumptive dorsal region and  
760 restricts *nodal* expression in the presumptive ventral region (Haillot et al., 2015). The output  
761 node values resulting from our ventral wild-type simulation (grey background) were then  
762 used to define the input node values for the ventral simulation of later developmental stages  
763 (red background). Additionally, taking into account the diffusion and shuttling events known  
764 to occur from the ventral region to further dorsal territories in this developmental time  
765 window, the output values of the 32-cell stage ventral simulation were also used to define the  
766 input node values for the simulation of the ciliary and dorsal regions in the blastula stage  
767 simulation (orange background).

# Figure 6

Mutant experiments

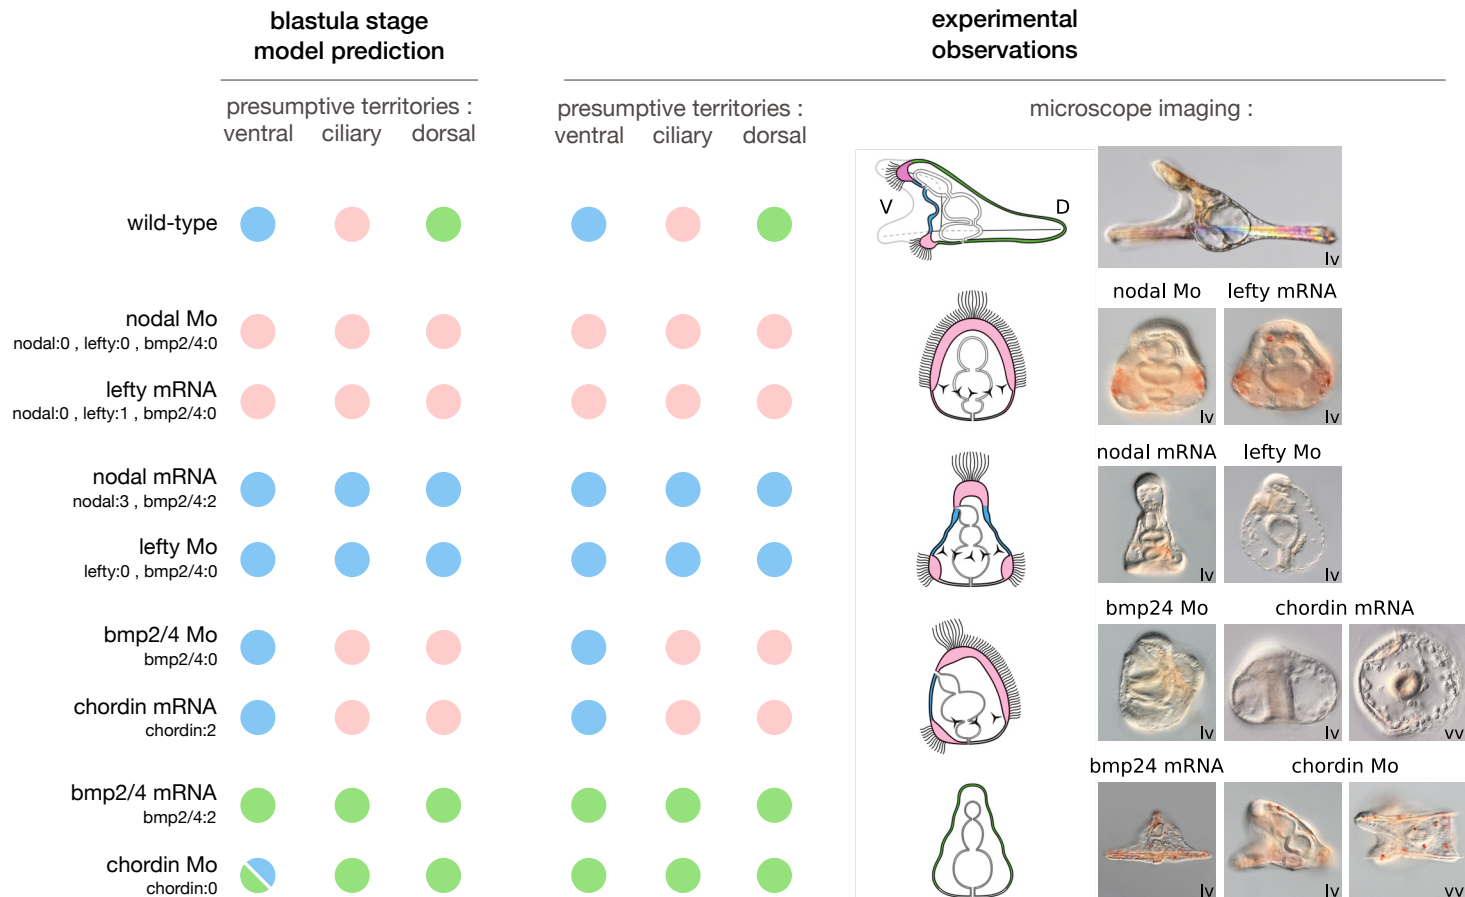

768 **Figure 6. Comparison of blastula model simulations and experimental results.**  
769 With proper logical rules (see Table 1), inputs and initial state conditions (see Fig. 5), our  
770 model gives rise to different stable patterns (circles, left), which qualitatively match  
771 experimental observations of dorsal (green), ventral (blue) and ciliary (pink) territories  
772 (circles, schematic and microscope imaging, right). Note that, in the case of the *chordin*  
773 morpholino, the model predicts two possible stable patterns in the ventral region, whereas  
774 experiments point to a weak ventral specification phenotype.

**Figure 7**

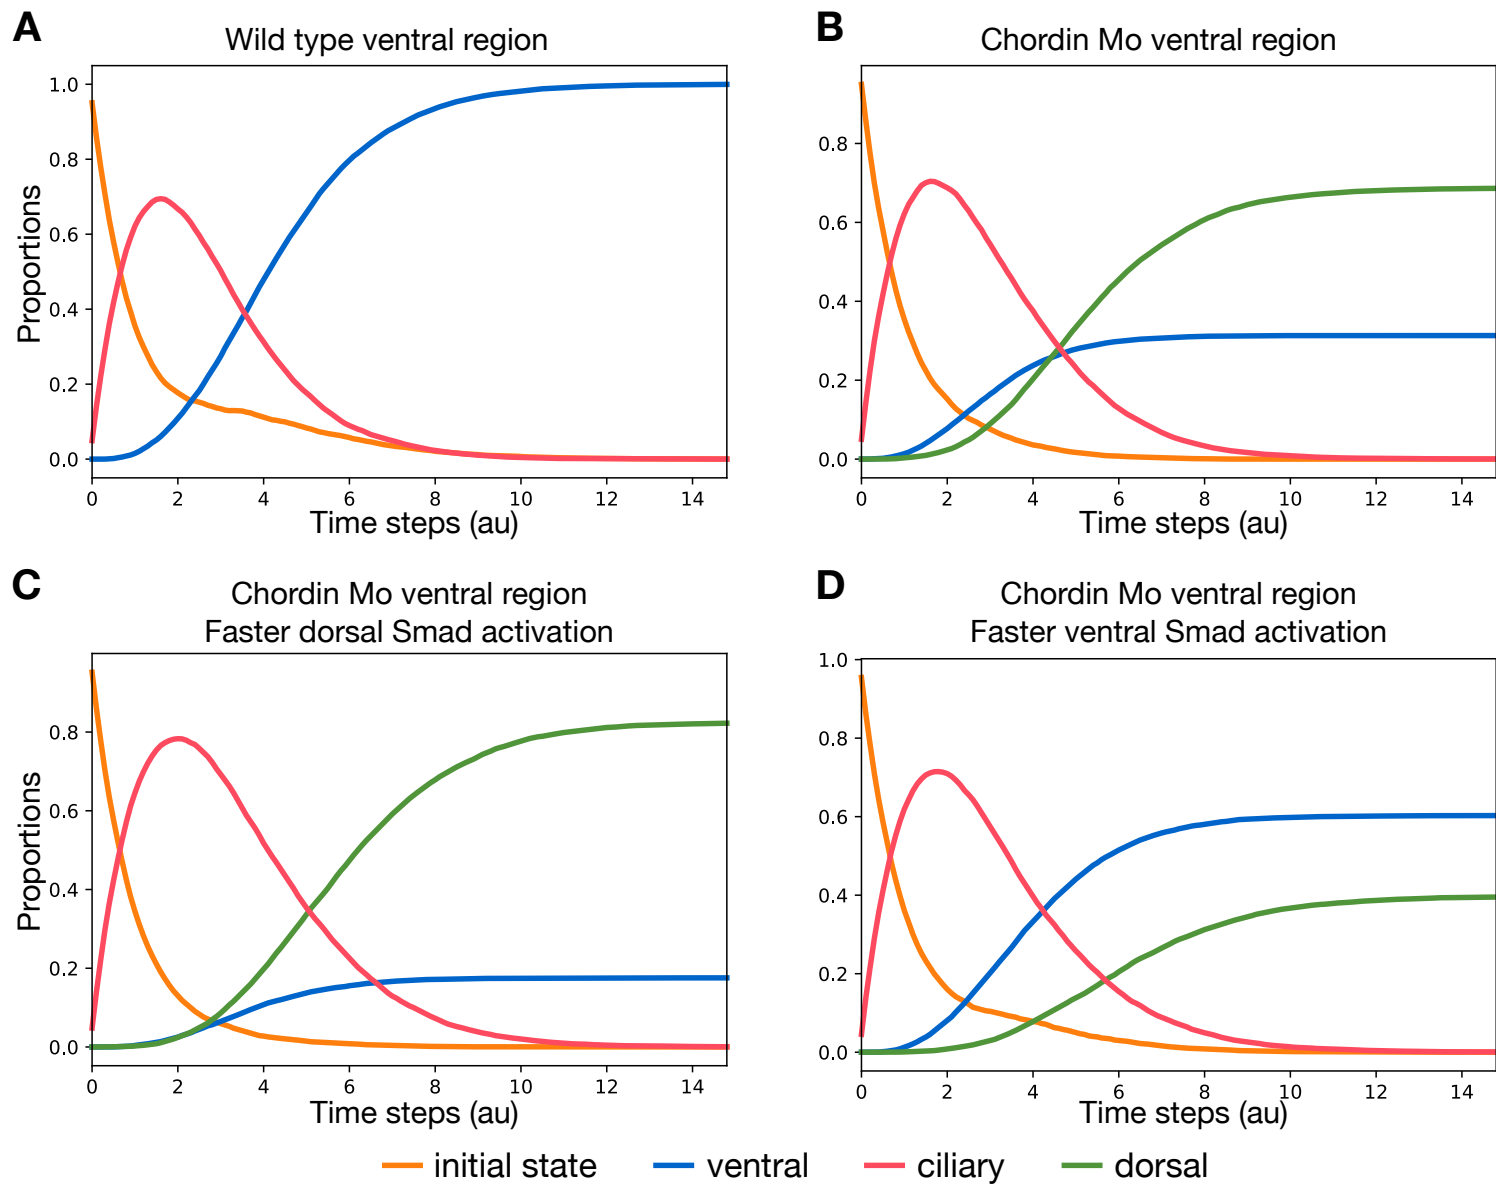

775 **Figure 7. Probabilistic time-course simulations of the unicellular model starting with the**  
776 **ventral initial state.**

777 These plots show the temporal evolutions of the mean activation levels of Goosecoid,  
778 Iroquois and Onecut, representing ventral (blue), dorsal (green) and ciliary (pink) phenotypes,  
779 respectively. All simulations start from a ventral initial state (orange). The first plot (A)  
780 corresponds to the wild type, while the three other ones (B, C, D) correspond to *chordin*  
781 knock down conditions. Simulations (A, B) were performed with equal up and down state  
782 transition rates. Further simulations were performed using rates favouring the dorsal cascade  
783 (C), or favouring the ventral cascade (D) (see supplementary material and methods for  
784 details).

**Figure 8**

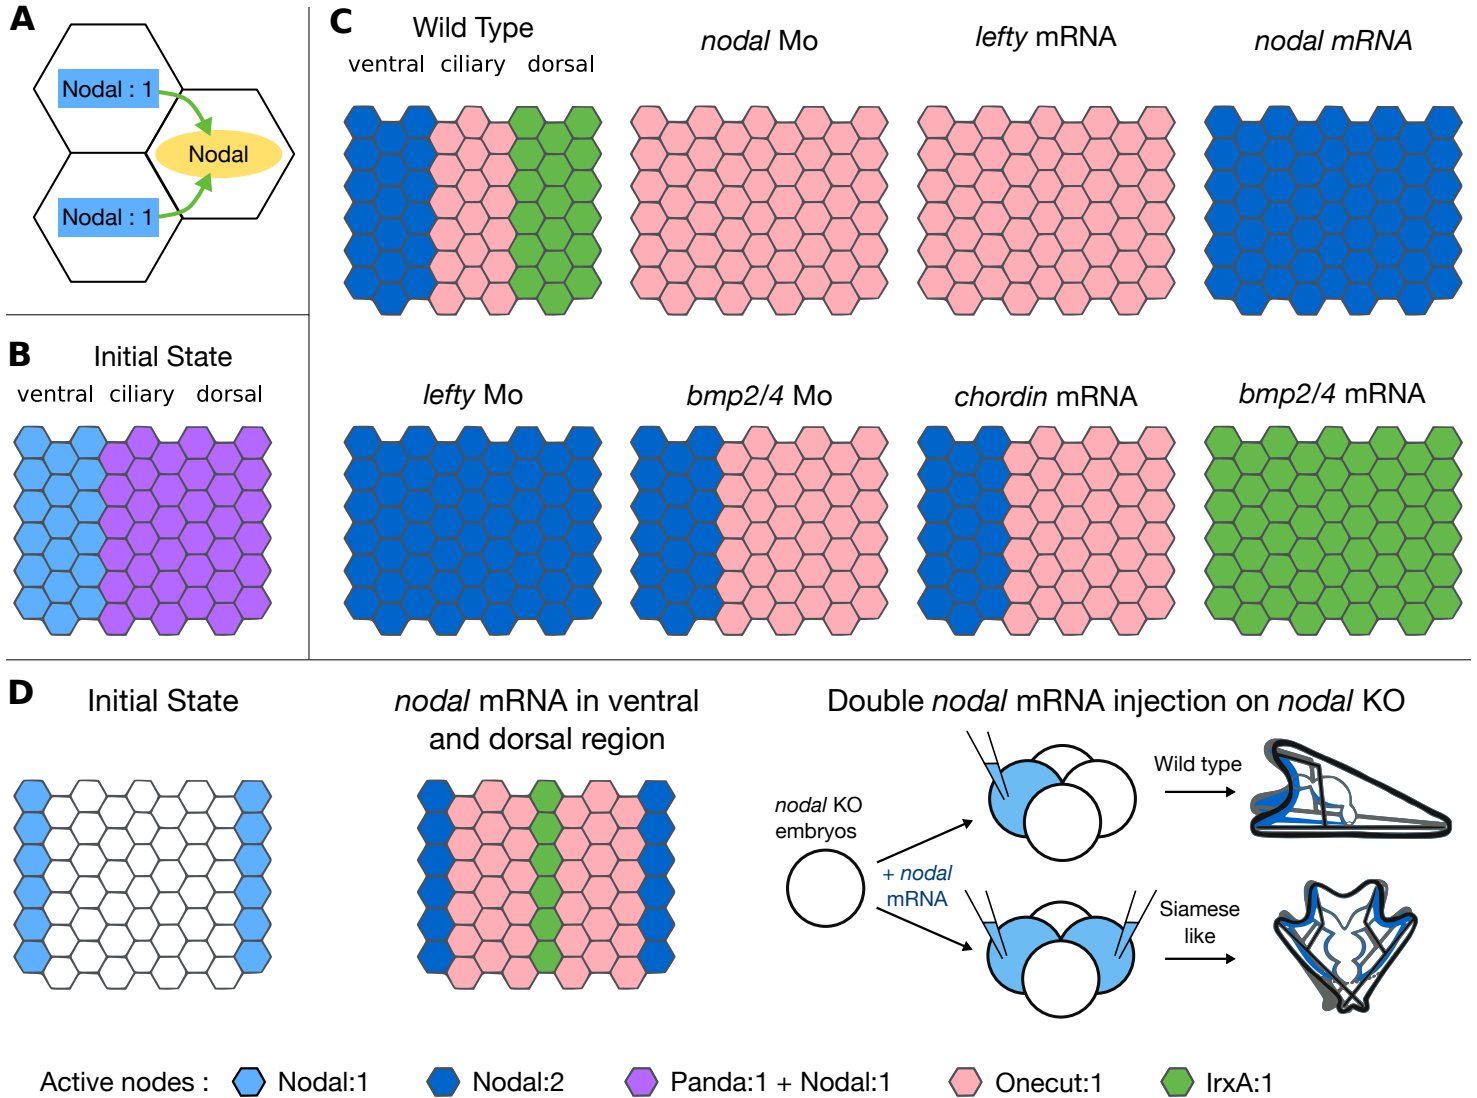

785 **Figure 8. Multicellular logical simulations for wild-type and morphant conditions, using**  
786 **the software Epilog.**

787 Across the multicellular epithelium, specific logical rules have been defined to model the  
788 diffusion of signalling components (A) (see Table 2 for diffusion rules). At the initial state,  
789 Panda is presents in the presumptive ciliary and dorsal territories, while Nodal is ubiquitously  
790 expressed in the whole epithelium (B). Multicellular simulation results for the wild-type and  
791 morphant conditions (C) qualitatively match our experimental results. We further simulated  
792 the injection of Nodal mRNA in a four-cell embryos in two opposite cells by initiating the  
793 model with two regions expressing *nodal* at the opposite poles of the epithelium (D, 1st and  
794 9th columns) which resulted in a morphant displaying a symmetric pattern of ventral, ciliary  
795 and dorsal territories along the dorsal-ventral axis, as observed by Lapraz et al., 2015 (D).  
796



# Supplementary Figure 1

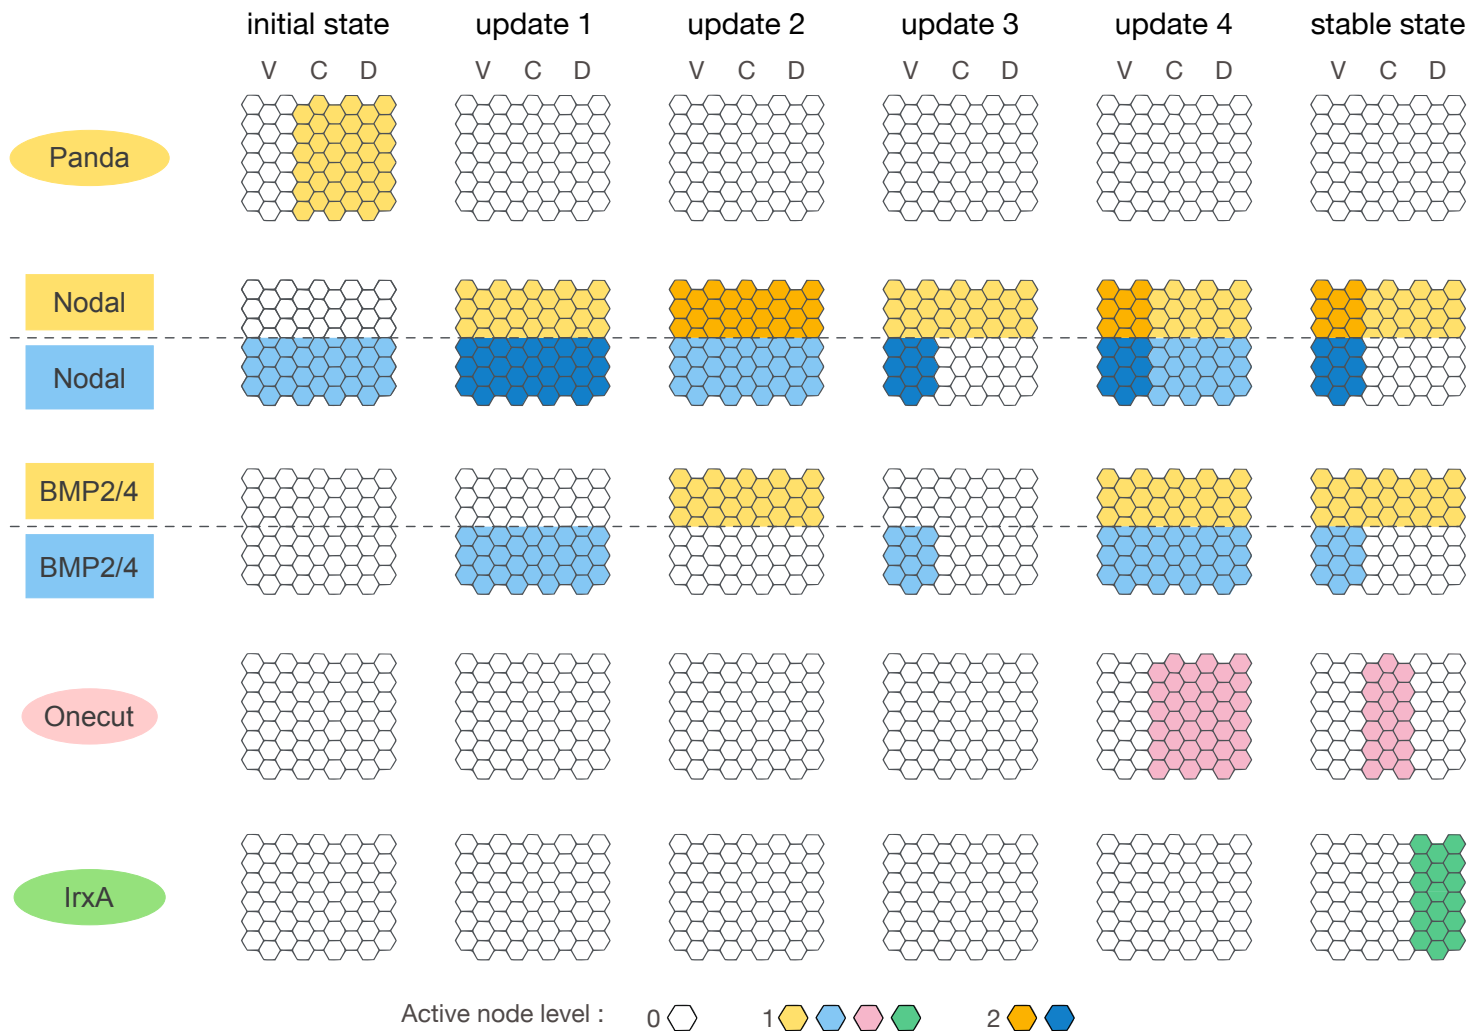

797 **Supplementary Figure 1. Intermediary states reached during wild-type simulation with**  
798 **EpiLog.**

799 Starting from the initial state (left) with Nodal ubiquitously active and Panda restricted to the  
800 ciliary and dorsal presumptive territories, the EpiLog simulation of the wild-type condition  
801 first predicts a transient expression of *nodal* in the whole ectoderm (Nodal output node in  
802 dark and light blue), which is then restricted to the ventral region in the stable state (right),  
803 although Nodal proteins still diffuse toward the dorsal region (Nodal input node in yellow).  
804 In parallel, the *bmp2/4* expression becomes restricted to the ventral side (BMP2/4 output  
805 node in blue) and BMP2/4 protein diffuse toward the dorsal region (BMP2/4 input node in  
806 yellow). The activity dynamics of the two markers genes *onecut* (pink, ciliary) and *irxa*  
807 (green, dorsal) denotes the progressive restriction of the ciliary band in the central region, as  
808 both Nodal and BMP2/4 cascade takes place in the ventral and dorsal territories. For the  
809 multilevel node Nodal, higher activity level is depicted by darker colours.

## Supplementary Figure 2

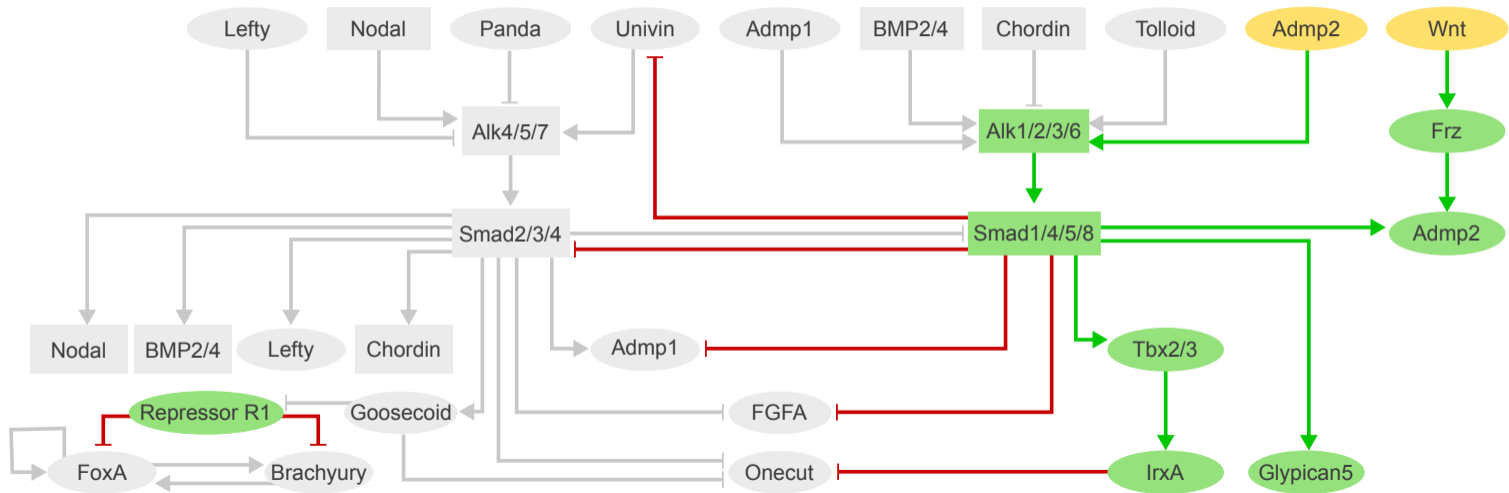

810 **Supplementary Figure 2. Simulation of the boundary ectoderm in the unicellular model.**

811 Stable state obtained with the unicellular model when considering Admp2 and Wnt inputs  
812 active. Active nodes (yellow for inputs and green for dorsal nodes) and edges (green for  
813 activation and red for inhibition) are shown in colour, inactive ones are shown in grey. This  
814 stable state mirror corresponds exactly to the dorsal stable state shown in Figure 6.

## Supplementary Figure 3

**A**

Model predictions

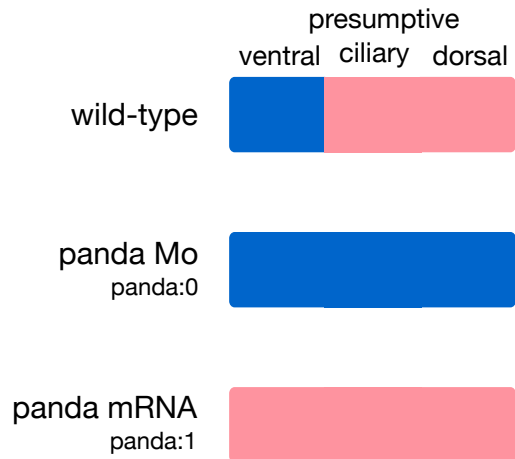

**B**

Experimental observations

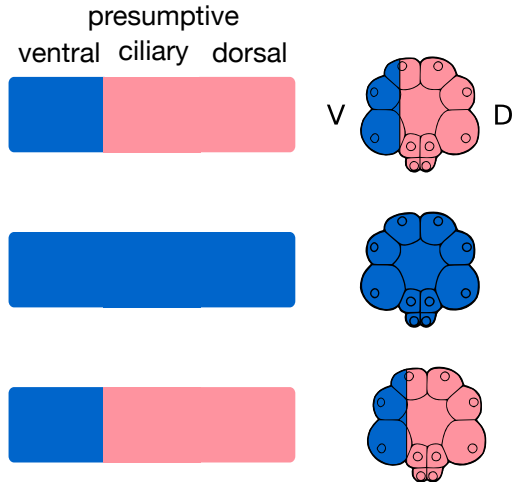

815 **Supplementary Figure 3. Simulation of *panda* perturbations at the 32-cell stage.**

816 Starting with a restricted combination of inputs with Nodal and Panda, we simulated the 32-  
817 cell stage D/V patterning using the unicellular model. In wild-type condition, model  
818 predictions (A) correctly recapitulates experimental observations (B). It is also the case for  
819 the simulation of Panda loss of function, mirroring the fully ventralised phenotype observed  
820 upon *panda* Mo injection. Simulations of *panda* overexpression fully abrogate ventral  
821 specification and result in a global ciliary phenotype (A), whereas experimental evidences  
822 show no impact of global overexpression of *panda* on the onset of D/V patterning (Haillot et  
823 al., 2015) (B).

825 **Acknowledgements**

826

827 We thank Aline Chessel for excellent technical help. We are indebted to Guillaume Lavisse  
828 for insightful comments. We thank Aurélie Martres for taking care of the sea urchins. We  
829 thank Aurelien Naldi for continuous help and support on the development of the Colomoto  
830 Jupyter Notebook. We thank Claudine Chaouiya and Pedro Monteiro for their support  
831 regarding the use of EpiLog. We thank Mathurin Dorel for his help in defining a preliminary  
832 version of the cellular model.

833

834 **Funding**

835

836 This work was supported by grants from the CNRS, the UNSA, the French Foundation for  
837 Cancer Research (ARC) SFI20121205586, and the National Agency for Research (ANR)  
838 (grant Echinodal ANR-14-CE11-0006-01 to TL), and by the FRM Team project  
839 DEQ20180339195 to TL. S. F. has been supported by a grant from the PhD School *Life*  
840 *Science Complexity* (ED 515) and another grant from the *Fondation pour la Recherche*  
841 *Médicale* FDT201904008366. M.D. Molina was supported by an EMBO long-term  
842 fellowship and by an ARC postdoctoral fellowship. E. Haillot was supported by a 4th year  
843 doctoral fellowship from the ARC. M.T.C. has been further supported by the *Institut*  
844 *Universitaire de France*.

845

846 **Competing interests**

847

848 No competing interests declared.

## References

- Armstrong, N. and McClay, D. R.** (1994). Skeletal pattern is specified autonomously by the primary mesenchyme cells in sea urchin embryos. *Dev. Biol.* **162**, 329–338.
- Armstrong, N., Hardin, J. and McClay, D. R.** (1993). Cell-cell interactions regulate skeleton formation in the sea urchin embryo. *Dev. Camb. Engl.* **119**, 833–840.
- Arnone, M. I. and Davidson, E. H.** (1997). The hardwiring of development: organization and function of genomic regulatory systems. *Development* **124**, 1851–1864.
- Ben-Zvi, D., Shilo, B.-Z., Fainsod, A. and Barkai, N.** (2008). Scaling of the BMP activation gradient in *Xenopus* embryos. *Nature* **453**, 1205–1211.
- Bolouri, H. and Davidson, E. H.** (2010). The gene regulatory network basis of the “community effect,” and analysis of a sea urchin embryo example. *Developmental Biology* **340**, 170–178.
- Chaouiya, C., Naldi, A. and Thieffry, D.** (2012). Logical modelling of gene regulatory networks with GINsim. *Methods Mol. Biol. Clifton NJ* **804**, 463–479.
- Chen, D., Zhao, M. and Mundy, G. R.** (2004). Bone Morphogenetic Proteins. *Growth Factors* **22**, 233–241.
- Cheng, S. K., Olale, F., Brivanlou, A. H. and Schier, A. F.** (2004). Lefty Blocks a Subset of TGF $\beta$  Signals by Antagonizing EGF-CFC Coreceptors. *PLoS Biol.* **2**, e30.
- De Robertis, E. M.** (2009). Spemann’s organizer and the self-regulation of embryonic fields. *Mech. Dev.* **126**, 925–941.
- Duboc, V., Röttinger, E., Besnardeau, L. and Lepage, T.** (2004). Nodal and BMP2/4 signaling organizes the oral-aboral axis of the sea urchin embryo. *Dev. Cell* **6**, 397–410.
- Duboc, V., Lapraz, F., Besnardeau, L. and Lepage, T.** (2008). Lefty acts as an essential modulator of Nodal activity during sea urchin oral-aboral axis formation. *Dev. Biol.* **320**, 49–59.
- Duloquin, L., Lhomond, G. and Gache, C.** (2007). Localized VEGF signaling from ectoderm to mesenchyme cells controls morphogenesis of the sea urchin embryo skeleton. *Dev. Camb. Engl.* **134**, 2293–2302.
- Hailot, E., Molina, M. D., Lapraz, F. and Lepage, T.** (2015). The Maternal Maverick/GDF15-like TGF- $\beta$  Ligand Panda Directs Dorsal-Ventral Axis Formation by Restricting Nodal Expression in the Sea Urchin Embryo. *PLoS Biol.* **13**, 1–38.
- Hardin, J., Coffman, J. A., Black, S. D. and McClay, D. R.** (1992). Commitment along the dorsoventral axis of the sea urchin embryo is altered in response to NiCl<sub>2</sub>. *Dev. Camb. Engl.* **116**, 671–685.
- Harland, R. M.** (1991). In situ hybridization: an improved whole-mount method for *Xenopus* embryos. *Methods Cell Biol.* **36**, 685–695.



- Hill, C. S.** (2016). Transcriptional Control by the SMADs. *Cold Spring Harb Perspect Biol* **8**,.
- Joubin, K. and Stern, C. D.** (2001). Formation and maintenance of the organizer among the vertebrates. *Int. J. Dev. Biol.* **45**, 165–175.
- Juan, H. and Hamada, H.** (2001). Roles of nodal-lefty regulatory loops in embryonic patterning of vertebrates. *Genes Cells Devoted Mol. Cell. Mech.* **6**, 923–930.
- Kimelman, D. and Pyati, U. J.** (2005). Bmp signaling: turning a half into a whole. *Cell* **123**, 982–984.
- Lapraz, F., Röttinger, E., Duboc, V., Range, R., Duloquin, L., Walton, K., Wu, S.-Y., Bradham, C., Loza, M. A., Hibino, T., et al.** (2006). RTK and TGF-beta signaling pathways genes in the sea urchin genome. *Dev. Biol.* **300**, 132–152.
- Lapraz, F., Besnardeau, L. and Lepage, T.** (2009). Patterning of the dorsal-ventral axis in echinoderms: Insights into the evolution of the BMP-chordin signaling network. *PLoS Biol.* **7**,.
- Lapraz, F., Haillot, E. and Lepage, T.** (2015). A deuterostome origin of the Spemann organiser suggested by Nodal and ADMPs functions in Echinoderms. *Nat. Commun.* **6**, 8434.
- Lele, Z., Nowak, M. and Hammerschmidt, M.** (2001). Zebrafish admp is required to restrict the size of the organizer and to promote posterior and ventral development. *Dev. Dyn.* **222**, 681–687.
- Lepage, T. and Gache, C.** (1989). Purification and characterization of the sea urchin embryo hatching enzyme. *J. Biol. Chem.* **264**, 4787–4793.
- Lepage, T. and Gache, C.** (1990). Early expression of a collagenase-like hatching enzyme gene in the sea urchin embryo. *EMBO J.* **9**, 3003–3012.
- Levine, M. and Davidson, E. H.** (2005). Gene regulatory networks for development. *Proc. Natl. Acad. Sci.* **102**, 4936–4942.
- Li, E., Materna, S. C. and Davidson, E. H.** (2012). Direct and indirect control of oral ectoderm regulatory gene expression by Nodal signaling in the sea urchin embryo. *Dev. Biol.* **369**, 377–385.
- Li, E., Materna, S. C. and Davidson, E. H.** (2013). New regulatory circuit controlling spatial and temporal gene expression in the sea urchin embryo oral ectoderm GRN. *Dev. Biol.* **382**, 268–279.
- Li, E., Cui, M., Peter, I. S. and Davidson, E. H.** (2014). Encoding regulatory state boundaries in the pregastrular oral ectoderm of the sea urchin embryo. *Proc. Natl. Acad. Sci.* **111**, E906–E913.
- Mbodj, A., Gustafson, E. H., Ciglar, L., Junion, G., Gonzalez, A., Girardot, C., Perrin, L., Furlong, E. E. M. and Thieffry, D.** (2016). Qualitative Dynamical Modelling

Can Formally Explain Mesoderm Specification and Predict Novel Developmental Phenotypes. *PLoS Comput. Biol.* **12**, 1–17.

- McIntyre, D. C., Seay, N. W., Croce, J. C. and McClay, D. R.** (2013). Short-range Wnt5 signaling initiates specification of sea urchin posterior ectoderm. *Dev. Camb. Engl.* **140**, 4881–4889.
- Molina, M. D. and Lepage, T.** (2020). Maternal factors regulating symmetry breaking and dorsal–ventral axis formation in the sea urchin embryo. In *Current Topics in Developmental Biology*, pp. 283–316. Elsevier.
- Molina, M. D., Quirin, M., Haillot, E., De Crozé, N., Range, R., Rouel, M., Jimenez, F., Amrouche, R., Chessel, A. and Lepage, T.** (2018). MAPK and GSK3/β-TRCP-mediated degradation of the maternal Ets domain transcriptional repressor Yan/Tel controls the spatial expression of nodal in the sea urchin embryo. *PLoS Genet.* **14**, e1007621.
- Molina, M. D., de Crozé, N., Haillot, E. and Lepage, T.** (2013). Nodal: master and commander of the dorsal–ventral and left–right axes in the sea urchin embryo. *Current Opinion in Genetics & Development* **23**, 445–453.
- Naldi, A.** (2018). BioLQM: A Java Toolkit for the Manipulation and Conversion of Logical Qualitative Models of Biological Networks. *Front. Physiol.* **9**, 1605.
- Naldi, A., Thieffry, D. and Chaouiya, C.** (2007). Decision Diagrams for the Representation and Analysis of Logical Models of Genetic Networks. In *Computational Methods in Systems Biology* (ed. Calder, M.) and Gilmore, S.), pp. 233–247. Berlin, Heidelberg: Springer.
- Peter, I. S., Faure, E. and Davidson, E. H.** (2012). Predictive computation of genomic logic processing functions in embryonic development. *Proc. Natl. Acad. Sci.* **109**, 16434–16442.
- Range, R. and Lepage, T.** (2011). Maternal Oct1/2 is required for Nodal and Vg1/Univin expression during dorsal–ventral axis specification in the sea urchin embryo. *Developmental Biology* **357**, 440–449.
- Range, R., Lapraz, F., Quirin, M., Marro, S., Besnardeau, L. and Lepage, T.** (2007). Cis-regulatory analysis of nodal and maternal control of dorsal-ventral axis formation by Univin, a TGF-β related to Vg1. *Development* **134**, 3649–3664.
- Reversade, B. and De Robertis, E. M.** (2005). Regulation of ADMP and BMP2/4/7 at opposite embryonic poles generates a self-regulating morphogenetic field. *Cell* **123**, 1147–1160.
- Röttinger, E., Saudemont, A., Duboc, V., Besnardeau, L., McClay, D. and Lepage, T.** (2008). FGF signals guide migration of mesenchymal cells, control skeletal morphogenesis [corrected] and regulate gastrulation during sea urchin development. *Dev. Camb. Engl.* **135**, 353–365.
- Sakuma, R., Ohnishi, Y., Meno, C., Fujii, H., Juan, H., Takeuchi, J., Ogura, T., Li, E., Miyazono, K. and Hamada, H.** (2002). Inhibition of Nodal signalling by Lefty

mediated through interaction with common receptors and efficient diffusion. *Genes Cells* **7**, 401–412.

- Saudemont, A., Haillot, E., Mekpoh, F., Bessodes, N., Quirin, M., Lapraz, F., Duboc, V., Röttinger, E., Range, R., Oisel, A., et al.** (2010). Ancestral Regulatory Circuits Governing Ectoderm Patterning Downstream of Nodal and BMP2/4 Revealed by Gene Regulatory Network Analysis in an Echinoderm. *PLOS Genet.* **6**, e1001259.
- Stoll, G., Caron, B., Viara, E., Dugourd, A., Zinovyev, A., Naldi, A., Kroemer, G., Barillot, E. and Calzone, L.** (2017). MaBoSS 2.0: an environment for stochastic Boolean modeling. *Bioinformatics* **33**, 2226–2228.
- Su, Y.-H., Li, E., Geiss, G. K., Longabaugh, W. J. R., Krämer, A. and Davidson, E. H.** (2009). A perturbation model of the gene regulatory network for oral and aboral ectoderm specification in the sea urchin embryo. *Dev. Biol.* **329**, 410–421.
- Thomas, R.** (1991). Regulatory networks seen as asynchronous automata: A logical description. *J. Theor. Biol.* **153**, 1–23.
- Thomas, R. and D’Ari, R.** (1990). *Biological feedback*. Boca Raton, FL etc.: CRC Press.
- Varela, P. L., Ramos, C. V., Monteiro, P. T. and Chaouiya, C.** (2019). EpiLog: A software for the logical modelling of epithelial dynamics. *F1000Research* **7**, 1145.
- Wilczynski, B. and Furlong, E. E. M.** (2010). Challenges for modeling global gene regulatory networks during development: Insights from *Drosophila*. *Dev. Biol.* **340**, 161–169.
- Willot, V., Mathieu, J., Lu, Y., Schmid, B., Sidi, S., Yan, Y.-L., Postlethwait, J. H., Mullins, M., Rosa, F. and Peyri eras, N.** (2002). Cooperative Action of ADMP- and BMP-Mediated Pathways in Regulating Cell Fates in the Zebrafish Gastrula. *Dev. Biol.* **241**, 59–78.
